# Supplementary material for: TWEAK/Fn14 Is Overexpressed in Crohn’s Disease and Mediates Experimental Ileitis by Regulating Critical Innate and Adaptive Immune Pathways
Source: PubMed Central journal article supplement — Cell Mol Gastroenterol Hepatol. 2019 Jun 7;8(3):427–46. doi: 10.1016/j.jcmgh.2019.05.009 (PMC6718944; doi:10.1016/j.jcmgh.2019.05.009), 2019-06-07
Supplement: mmc1.pdf [file mmc1.pdf]

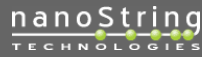

nCounter Mouse Immunology Panel Gene List

| Official Symbol | Accession                      | Alias / Prev Symbol                  | GO Annotation*                       | Target Sequence                            | Official Full Name                                                                    |
|-----------------|--------------------------------|--------------------------------------|--------------------------------------|--------------------------------------------|---------------------------------------------------------------------------------------|
| Abcb10          | <a href="#">NM_019552.2</a>    | ABC-me                               | Membrane,Integral To Membrane,       | CTGGGGCCAGGCCTCCGTTGGTGTGGCATGATGTTTT      | ATP-binding cassette, sub-family B (MDR/TAP), member 10                               |
| Abcb1a          | <a href="#">NM_011076.1</a>    | mdr-3, Mdr1a, P-gp, P-glycoprotein   | Golgi Membrane,Cell Surface,Mem      | AAGGGGTACAGGGTCTAGGCTGCTGTGATTTCCAGA       | ATP-binding cassette, sub-family B (MDR/TAP), member 1A                               |
| Abcf1           | <a href="#">NM_013854.1</a>    | Abc50, GCN20, D17Wsu166e             | Nucleoplasm,Cytoplasm,Nucleus,Ri     | GAGGTGTCTTCCCGCAGGCAATGTAGAAAATGCATCT      | ATP-binding cassette, sub-family F (GCN20), member 1                                  |
| Abl1            | <a href="#">NM_009594.3</a>    | c-Abl                                | Cytoplasm,Nucleus,Cytosol,Cytoske    | CGTCCATCTCTCTGGTCTTACCTTGATGACAAAGGAT      | c-abl oncogene 1, non-receptor tyrosine kinase                                        |
| Adal            | <a href="#">NM_029475.1</a>    |                                      | Nucleotide Metabolic Process,Dea     | AGATCTTCTCGCCCTGTGTATCTACTCAGTACTGCCAC     | adenosine deaminase-like                                                              |
| Ahr             | <a href="#">NM_013464.4</a>    | dioxin receptor, In, Ah, Ahh, Ahre,  | Cytoplasm,Nucleus,Cytosol,Transcr    | CTGCAGACATACTTCACTGTGCAGAAATCCACATCCGCAT   | aryl-hydrocarbon receptor                                                             |
| Aicda           | <a href="#">NM_009645.2</a>    | Aid                                  | Cytoplasm,Nucleus,Mrna Processin     | AATCGTGAAAGAACTTCAAAGCCTGGGAAGGGCTACAT     | activation-induced cytidine deaminase                                                 |
| Aire            | <a href="#">NM_009646.1</a>    |                                      | Cytoplasm,Nucleus,Actin Cytoskele    | TCCAGGAACCCGAGGGCCGTGGAGGGATCCTTATCCA      | autoimmune regulator (autoimmune polyendocrinopathy candidiasis ectodermal dystrophy) |
| App             | <a href="#">NM_007471.2</a>    | betaAPP, Abeta, protease nexin II,   | Cell Surface,Axon,Golgi Apparatus,   | GTGAGCGACGCCCTTCTCGTGCCCGACAAGTGCAAGTTC    | amyloid beta (A4) precursor protein                                                   |
| Arhgdib         | <a href="#">NM_007486.4</a>    | D4, Ly-GDI, Gdid4                    | Cytoplasm,Regulation Of Catalytic    | /GTTACCCGGCTTAGCCTTGTATGTGACAGTGACCAGGA    | Rho, GDP dissociation inhibitor (GDI) beta                                            |
| Atg16l1         | <a href="#">NM_029846.3</a>    | APG16L, WDR30                        | Membrane,Cytoplasm,Transport,Pr      | TGATAGTCTGGGACTTACCTATTAGCAGCTTCAAATGAT    | autophagy-related 16-like 1 (yeast)                                                   |
| Atm             | <a href="#">NM_007499.1</a>    |                                      | Cytoplasm,Nucleus,Spindle,Cytopla    | AAACTCTCACCTTGATGAGGATCGAACAGAGCTGCAAC     | ataxia telangiectasia mutated homolog (human)                                         |
| B2m             | <a href="#">NM_009735.3</a>    | beta 2 microglobulin, beta2-m, Ly    | External Side Of Plasma Membrane     | CTGAAGTCTACGTAACACAGTCCACCCGCTCACATTG      | beta-2 microglobulin                                                                  |
| Batf            | <a href="#">NM_016767.2</a>    | B-ATF, SFA-2                         | Nucleus,Transcription Dna Depend     | ACTGGACTCTCCAGGGGAAGTCGAGCAATGACTGGAC      | basic leucine zipper transcription factor, ATF-like                                   |
| Batf3           | <a href="#">NM_030060.2</a>    |                                      | Nucleus,Transcription Dna Depend     | CCATGAACCTTGTGCAGCTTCGGTCAGACCCCGGGCCA     | basic leucine zipper transcription factor, ATF-like 3                                 |
| Bax             | <a href="#">NM_007527.3</a>    |                                      | Mitochondrial Outer Membrane,M       | CATAAATATGACATTTTCTGGGATGAATGGGGGAAGG      | BCL2-associated X protein                                                             |
| Bcap31          | <a href="#">NM_012060.4</a>    | BAP31                                | Golgi Membrane,Membrane,Endopl       | GCTCCATCCCTCTGTGGGAACCCCTTAAGTACAGGATG     | B cell receptor associated protein 31                                                 |
| Bcl2            | <a href="#">NM_009741.3</a>    | Bcl-2                                | Mitochondrial Outer Membrane,M       | GGCCTCTTTGAGTTCGGTGGGGTCATGTGTGGAGAG       | B cell leukemia/lymphoma 2                                                            |
| Bcl3            | <a href="#">NM_033601.3</a>    | Bcl-3                                | Cytoplasm,Nucleus,Protein Comple     | CCCCACTTAATCTCAGGCACCCAGGTTCCCTGTCTGGAAT   | B cell leukemia/lymphoma 3                                                            |
| Bcl6            | <a href="#">NM_009744.3</a>    | Bcl5                                 | Nucleus,Negative Regulation Of Ap    | ACGTGTATCTGTGGTGGAGCCGTGAGCAGTTAGAGCCC     | B cell leukemia/lymphoma 6                                                            |
| Bid             | <a href="#">NM_007544.3</a>    |                                      | Membrane,Cytoplasm,Cytosol,Mitc      | AATCATGCACAGCACTTATCTGTGTGGTGCAGTTACAT     | BH3 interacting domain death agonist                                                  |
| Blink           | <a href="#">NM_008528.4</a>    | SLP-65, BLNK, BASH, BCA, Ly-57, B    | Membrane,Cytoplasm,Plasma Men        | CTGAAGAGCCCTGCACAGATCCAACAAGGATGGATCGT     | B cell linker                                                                         |
| Bst1            | <a href="#">NM_009763.3</a>    | 114/A10, Ly65, Bsta1, Bp3, CD157     | Membrane,Anchored To Membran         | TGCAGTATTCAAGAGACAGTTCAGGGGTGATCAACGTCA    | bone marrow stromal cell antigen 1                                                    |
| Bst2            | <a href="#">NM_198095.2</a>    | C87040, Bst-2, GREG                  | Golgi Apparatus,Membrane,Anchoi      | CAGCTCCATGGTGGTCTCCAGCCTACTGGTCAAAAGTC     | bone marrow stromal cell antigen 2                                                    |
| Btk             | <a href="#">NM_013482.2</a>    | Bruton's tyrosine kinase, xid, X-lin | Membrane,Cytoplasm,Nucleus,Cyt       | GAAAGAGCCCTGGACATCTAGGAATGCCTTTCTCTCTGT    | Bruton agammaglobulinemia tyrosine kinase                                             |
| Btla            | <a href="#">NM_177584.3</a>    |                                      | External Side Of Plasma Membrane     | ATTCATCAGCTTGAGGCTTGAGTCTCAGACCCAAAAC      | B and T lymphocyte associated                                                         |
| Btln1           | <a href="#">NM_001111094.1</a> | Gm33, Btln3, Gm316                   |                                      | TTTACAAACATGACCGATGAGACACACATCTTTTCTTTT    | butyrophilin-like 1                                                                   |
| Btln2           | <a href="#">NM_079835.2</a>    | BTL-II, butyrophilin-like MHC clas   | Membrane,Integral To Membrane        | TCCTCTCGTCTGCTGACTATAAGACCCAGATGACTTC      | butyrophilin-like 2                                                                   |
| C1qa            | <a href="#">NM_007572.2</a>    | C1q                                  | Extracellular Region,Collagen        | CAGTCCCGGCTTCTTACTTCACTCAAGTGATCTCC        | complement component 1, q subcomponent, alpha polypeptide                             |
| C1qb            | <a href="#">NM_009777.2</a>    |                                      | Extracellular Region,Collagen,Innat  | CTGGCAACAGCATCTTCACTGGCTTTCTGCTTTCCCTGAC   | complement component 1, q subcomponent, beta polypeptide                              |
| C1qbp           | <a href="#">NM_007573.2</a>    | HABP1, P32, D11Wsu182e               | Membrane,Cytoplasm,Nucleus,Extr      | CTCTGAGGATGAGATTGGACACGAAGATGAGGCGGAGA     | complement component 1, q subcomponent binding protein                                |
| C1ra            | <a href="#">NM_023143.3</a>    | mC1rA                                | Extracellular Region,Proteolysis,    | INNCAATGACCTTCTATGGCCAAAGCCTCATGGTTATGT    | complement component 1, r subcomponent A                                              |
| C1s             | <a href="#">NM_144938.2</a>    |                                      | Extracellular Region,Proteolysis,    | INNGGCAGGGTGTGATCACTGAGCCGTGTGGTTATTCAGTTA | complement component 1, s subcomponent                                                |
| C2              | <a href="#">NM_013484.2</a>    | classical-complement pathway C3      | Extracellular Region,Proteolysis,    | INNATGGTGTCTGGACTTCTGCCACTTAAACATGGTCACTG  | complement component 2 (within H-2S)                                                  |
| C3              | <a href="#">NM_009778.2</a>    | complement factor 3, acylation st    | Extracellular Region,Extracellular   | SjAAGACTTCTTAAAGAGCAAGTGTGACCAAGTGAAGA     | complement component 3                                                                |
| C4a             | <a href="#">NM_011413.2</a>    | Slp                                  |                                      | TCCTTGGGGGCTGGTGGGTGTTGAGTCTGTGCTC         | complement component 4A (Rodgers blood group)                                         |
| C4bp            | <a href="#">NM_007576.3</a>    |                                      | Extracellular Region,Cytoplasm,Inn   | AAATGGAGAGACTACATTTTGGATCACAGATAGAATT      | complement component 4 binding protein                                                |
| C6              | <a href="#">NM_016704.2</a>    |                                      | Extracellular Space,Positive Regulat | CTGATTGACAAAGAGTGAAGCCTGTTTCTGTGACCACTAC   | complement component 6                                                                |
| C7              | <a href="#">XM_356827.6</a>    | A530026G17, Gm1238                   |                                      | AGACAAATGTGAAAATGGCTAACCCCTCTCTGCAACAT     | complement component 7                                                                |
| C8a             | <a href="#">NM_146148.1</a>    |                                      | Extracellular Region,Membrane,Int    | CGAGTGCCATTACATATCAGTCTGGGGGAGATCGTTAA     | complement component 8, alpha polypeptide                                             |
| C8b             | <a href="#">NM_133882.2</a>    |                                      | Extracellular Region,Extracellular   | SjGTTACTGCTGTGCTGGAGGAAGTTTCGGTATTGGTGT    | complement component 8, beta polypeptide                                              |
| C8g             | <a href="#">NM_027062.1</a>    |                                      | Extracellular Region,Extracellular   | SjGAGCGGCGAGTCAGGGAAGCCAACTGCAGAGAAGATCA   | complement component 8, gamma polypeptide                                             |
| C9              | <a href="#">NM_013485.1</a>    |                                      | Extracellular Region,Membrane,Int    | TCCTTGCTCAAAAGGTTTCGCTCAAGAAGCATTTTA       | complement component 9                                                                |
| Camp            | <a href="#">NM_009921.2</a>    | MCLP, Cramp, Cnlp, CAP18, FALL3      | Extracellular Region,Cytoplasm,Cell  | AACCCGGCCGCTGATTTCTTTGACATCAGCTGTAACGAGC   | cathelicidin antimicrobial peptide                                                    |
| Card9           | <a href="#">NM_01037747.1</a>  | LOC332579                            | Cytoplasm,I kappaB Kinase Nf Kapp    | GAGGGCAGACTCAAGCAGCAGCAATTTGGATGCTCATC     | caspase recruitment domain family, member 9                                           |
| Casp1           | <a href="#">NM_009807.2</a>    | ICE, Caspase-1, interleukin 1 beta-  | Extracellular Region,Cytoplasm,Nur   | GACAATAAATGGATTTGGTGAATCTTTAGAGAAGAG       | caspase 1                                                                             |
| Casp2           | <a href="#">NM_007610.1</a>    | Ich-1, Caspase-2, Nedd2              | Cytoplasm,Nucleus,Membrane Fra       | CTACTATGCTCCAGCCCTTAGGTCCTATCTCCGCTCT      | caspase 2                                                                             |
| Casp3           | <a href="#">NM_009810.2</a>    | CPP32, Yama, Apopain, Caspase-3      | Cytoplasm,Nucleus,Cytosol,Mitoch     | GAGGCTGACTTCTCTGATGTTACTCTACAGCACTCGTT     | caspase 3                                                                             |
| Casp8           | <a href="#">NM_009812.2</a>    | FLICE, MACH, Mch5, Caspase-8         | Cytoplasm,Nucleus,Cytosol,Lipid R    | TTTTATTGAGTCTGCAAGGAAGTAACTTCCAGAAGG       | caspase 8                                                                             |
| Csbp2           | <a href="#">NM_021609.3</a>    | D6, CCR9, CCR10, Cmkbr9              | Membrane,Integral To Membrane,       | TTTTGAAGCATTCAGGTTCACTCCAGTAGGGAGAGTTC     | chemokine binding protein 2                                                           |
| Ccl11           | <a href="#">NM_011330.3</a>    | eotaxin, Scya11                      | Extracellular Region,Extracellular   | SjCAACTCTCTCTTGACACTAACCCAGGCTAAGAAAGT     | chemokine (C-C motif) ligand 11                                                       |
| Ccl12           | <a href="#">NM_011331.2</a>    | MCP-5, Scya12                        |                                      | ATGAAGATTCCACACTTCTATGCTCTCTGCTCATAGCTA    | chemokine (C-C motif) ligand 12                                                       |
| Ccl19           | <a href="#">NM_011888.2</a>    | exodus-3, Scya19, CKb11              | External Side Of Plasma Membrane     | CTTCTGCCAAGAACAAGGCCAACAGCACCAGAAGGAGCC    | chemokine (C-C motif) ligand 19                                                       |
| Ccl2            | <a href="#">NM_011333.3</a>    | monocyte chemotactic protein, M      | Extracellular Region,Cytoplasm,Cell  | TCTTCAAGCCTTTGAATGTGAAGTTGACCCGTAATCTG     | chemokine (C-C motif) ligand 2                                                        |
| Ccl20           | <a href="#">NM_016960.1</a>    | MIP-3[a], ST38, MIP3A, MIP-3A, e     | Extracellular Region,Extracellular   | SjGCCAAGCAACTACGACTGTTGCTCTGTCATACAG       | chemokine (C-C motif) ligand 20                                                       |
| Ccl22           | <a href="#">NM_009137.2</a>    | ABCD-1, MDC, Scya22                  | Extracellular Region,Extracellular   | SjCCAAGAATCACTTCCACCTCTTCAACCACATGCTAGG    | chemokine (C-C motif) ligand 22                                                       |
| Ccl24           | <a href="#">NM_019577.4</a>    | eotaxin-2, MIPF-2, Scya24, Ckb-6     | Extracellular Region,Extracellular   | SjCTGATGCCAAGAAAACCAGCTTCTAAAGGGGCCAAG     | chemokine (C-C motif) ligand 24                                                       |
| Ccl25           | <a href="#">NM_009138.3</a>    | TECK, Ckb15, Scya25                  | Extracellular Space,Leukocyte Mig    | GTGCCAATGAACCTACTGAAGTACAGTTTCTGTACAAG     | chemokine (C-C motif) ligand 25                                                       |
| Ccl26           | <a href="#">NM_001013412.2</a> | eotaxin-3, Ccl26l                    | Extracellular Space,Positive Regulat | CAGCTATAAGTCCAGCAAGAGCTGCACCAGTACGG        | chemokine (C-C motif) ligand 26                                                       |
| Ccl3            | <a href="#">NM_011337.1</a>    | MIP-1 alpha, MIP1-alpha, MIP1-(a     | Extracellular Region,Cytoplasm,Cyt   | TCTGTCACTGCTCAACATCATGAAGGTTCCACCCTGCI     | chemokine (C-C motif) ligand 3                                                        |

|        |                                |                                                                |                                           |                                           |                                                                                                       |
|--------|--------------------------------|----------------------------------------------------------------|-------------------------------------------|-------------------------------------------|-------------------------------------------------------------------------------------------------------|
| Ccl4   | <a href="#">NM_013652.1</a>    | MIP-1 beta, MIP-1B, Mip1b, Act-2                               | Extracellular Region, Extracellular       | S1TCTCAGCACCAATGGGCTCTGACCCCTCCACTTCTGCTC | chemokine (C-C motif) ligand 4                                                                        |
| Ccl5   | <a href="#">NM_013653.1</a>    | MuRantes, Scya5, SISd, TCP228, R                               | Extracellular Region, Cytoplasm, Ext      | CCTCGTGCCACAGTCAAGGAGTATTCTACACCAGCAGCA   | chemokine (C-C motif) ligand 5                                                                        |
| Ccl6   | <a href="#">NM_009139.2</a>    | c10, Scya6, MRP-1                                              | Extracellular Region, Extracellular       | S1ATGTAGCCACAGGACTGTCTTCTTTCAGATTATAGAA   | chemokine (C-C motif) ligand 6                                                                        |
| Ccl7   | <a href="#">NM_013654.2</a>    | fic, mcp3, marc, Scya7, MCP-3                                  | Extracellular Region, Extracellular       | S1ACAGAAGGATCACCAGTAGTCGGTGTCCCTGGGAAGCTC | chemokine (C-C motif) ligand 7                                                                        |
| Ccl8   | <a href="#">NM_021443.2</a>    | RP23-446K18.1, 1810063B2ORik, AB023418, HC14, MCP-2, Mcp2, Scy | ACTGCTGCTTTCATGTACTAAAGCTGAAGATCCCCCTTCTC | chemokine (C-C motif) ligand 8            |                                                                                                       |
| Ccl9   | <a href="#">NM_011338.2</a>    | MRP-2, CCF18, MIP-1 gamma, Scy                                 | Extracellular Region, Extracellular       | S1ATGGCAACCCAGGTACATTCACTAGGATGAAATAAATTC | chemokine (C-C motif) ligand 9                                                                        |
| Ccr10  | <a href="#">NM_007721.4</a>    | GPR2, CCR10, Cmkbr9                                            | Membrane, Integral To Membrane,           | GGTTTCTCTCGGGAGTCAGTGAAGAAAGGGCTTTCTA     | chemokine (C-C motif) receptor 10                                                                     |
| Ccr2   | <a href="#">NM_009915.2</a>    | Cmkbr2, CKR2, CCR2A, CCR2B, CKI                                | Membrane, Cytosol, Perinuclear Reg        | ATGAACATAACATAGACGCTCAGGATTAACAGGACTTG    | chemokine (C-C motif) receptor 2                                                                      |
| Ccr3   | <a href="#">NM_009914.4</a>    | MIP-1 alphaRL2, Cmkbr3, CKR3, C                                | Membrane, Integral To Membrane,           | CTATATGTTTATTCTGGCACACAGCCCTAGAAATCTC     | chemokine (C-C motif) receptor 3                                                                      |
| Ccr4   | <a href="#">NM_009916.2</a>    | CC CKR-4, Cmkbr4                                               | External Side Of Plasma Membrane          | GCTGTGAGAAGCTGCTGGTGCAGAGAAGGGTGAA        | chemokine (C-C motif) receptor 4                                                                      |
| Ccr5   | <a href="#">NM_009917.5</a>    | CD195, Cmkbr5                                                  | External Side Of Plasma Membrane          | GAGCAGGGAGAACGAGTCTTTATCAGGGCCGGGAAA      | chemokine (C-C motif) receptor 5                                                                      |
| Ccr6   | <a href="#">NM_001190333.1</a> | Cmkbr6                                                         | Membrane, Integral To Membrane,           | CTACCGTCTGGGCACTACTCATGCCAACACTTGGG       | chemokine (C-C motif) receptor 6                                                                      |
| Ccr7   | <a href="#">NM_007719.2</a>    | EBI1, Ebi1h, CD197, Cmkbr7                                     | External Side Of Plasma Membrane          | CCCAGATGGTTTTGGGTTCTAGTGCCTATGCTGGCTAT    | chemokine (C-C motif) receptor 7                                                                      |
| Ccr8   | <a href="#">NM_007720.2</a>    | Cmkbr8                                                         | Membrane, Integral To Membrane,           | GTTCTTACCCCTAATGAGTGTGGACAGGATCTGGCT      | chemokine (C-C motif) receptor 8                                                                      |
| Ccr9   | <a href="#">NM_009913.6</a>    | GPR-9-6, Cmkbr10                                               | Membrane, Integral To Membrane,           | TATACCATCATCTTACACTTGGTACAGGCCAAGAAGT     | chemokine (C-C motif) receptor 9                                                                      |
| Ccr11  | <a href="#">NM_145700.2</a>    | CCR11, VSHK1, CX-CKR, PPR1, CC                                 | Membrane, Integral To Membrane,           | TGCCTTCTGGGCGTAAATGAGTTCACGGATGGATTCT     | chemokine (C-C motif) receptor-like 1                                                                 |
| Ccr12  | <a href="#">NM_017466.4</a>    | L-CCR, CCR11, Cmkbr12                                          | Membrane, Integral To Membrane,           | TGTTGGCGTGGTCTCTGGCAACGCTGGCGGT           | chemokine (C-C motif) receptor-like 2                                                                 |
| Cd109  | <a href="#">NM_153098.3</a>    | Gov platelet alloantigens                                      | Extracellular Region, Membrane, An        | AATGACTTCAAATGACACCAATGGCACATATACCGGAA    | CD109 antigen                                                                                         |
| Cd14   | <a href="#">NM_009841.3</a>    |                                                                | Cell Surface, Membrane, Anchored          | TCTAGACGAGAAAGTGTCTGCAACTTCTCAGATCCG      | CD14 antigen                                                                                          |
| Cd160  | <a href="#">NM_001163496.1</a> | By55                                                           | Anchored To Plasma Membrane,              | SigAGATGGCTAGAGGGAGCTGCAGTCATAACACTGGTG   | CD160 antigen                                                                                         |
| Cd163  | <a href="#">NM_053094.2</a>    |                                                                | Extracellular Region, Membrane, Int       | TCACGGCACTCTGGTTTGGGACCACTTATTGGTCTC      | CD163 antigen                                                                                         |
| Cd164  | <a href="#">NM_016898.2</a>    | MGC-24, A115, A24                                              | Membrane, Integral To Membrane,           | ATATTGAAGAAGTCCCACATGGAAGCGCTGTCCAGGA     | CD164 antigen                                                                                         |
| Cd19   | <a href="#">NM_009844.2</a>    |                                                                | External Side Of Plasma Membrane          | GACTTCGTTAGTCCCAAGAACCATCTGATTCTGAAAT     | CD19 antigen                                                                                          |
| Cd1d1  | <a href="#">NM_007639.3</a>    | CD1.1, Cd1d, Cd1a, Ly-38                                       | External Side Of Plasma Membrane          | GTTTTATGGGATTTGCACTGAAGTGAAGCATACTCT      | CD1d1 antigen                                                                                         |
| Cd2    | <a href="#">NM_013486.2</a>    | LFA-2, Ly37, Ly-37                                             | External Side Of Plasma Membrane          | ATCAGAAACGTTAGGTTCTAGCAAACGGATCCCTGAA     | CD2 antigen                                                                                           |
| Cd209g | <a href="#">NM_027343.3</a>    |                                                                | Sugar Binding                             | GAAAGAAGGGGAGCCAATAATGAAGGGGACGAGGAC      | CD209g antigen                                                                                        |
| Cd22   | <a href="#">NM_001043317.2</a> | Lyb-8, Lyb8                                                    | External Side Of Plasma Membrane          | CTCTGACCTGGGACTGAATTTCTCTGCTTTGGTATGA     | CD22 antigen                                                                                          |
| Cd226  | <a href="#">NM_001039149.1</a> | Pta1, DNAM1, DNAM-1, TLISA1                                    | Cell Surface, Membrane, Integral To       | GAGACGGAGACAGGTGAAGAATCCACTTAAAGAGCCCA    | CD226 antigen                                                                                         |
| Cd244  | <a href="#">NM_018729.2</a>    | 2B4, C9.1, F730046015Rik, Ly90, NAIL, NKR2B4, Nmrk, SLAMF4     | TACAGACAAAAGATGTTTCTGTTCAATGGAAGAAGACAG   | CD244 natural killer cell receptor 2B4    |                                                                                                       |
| Cd247  | <a href="#">NM_001113391.2</a> | TCRk, Cd3h, CD3-eta, CD3-zeta, Cc                              | Membrane, Cytoplasm, Integral To          | IGCTTGGTCTGCTGGATCCAAACTCTGCTACTTGCTAGA   | CD247 antigen                                                                                         |
| Cd24a  | <a href="#">NM_009846.2</a>    | heat stable antigen, HSA, Ly-52, cl                            | External Side Of Plasma Membrane          | TGGCTTAGGAAATGTGGACACTAAAACCTCACTTGA      | CD24a antigen                                                                                         |
| Cd27   | <a href="#">NM_001042564.1</a> | Cd27, Tp55, S152, Tnfrsf7                                      | External Side Of Plasma Membrane          | GTGGCCAGCAAGCTGGGAGACTCAGCTCTAGCTATA      | CD27 antigen                                                                                          |
| Cd274  | <a href="#">NM_021893.2</a>    | PD-L1, B7-H1, Pdcd1lg1                                         | External Side Of Plasma Membrane          | TGAATAATATGTCAGCCGAGGGTTATCCAGAAGCTGA     | CD274 antigen                                                                                         |
| Cd28   | <a href="#">NM_007642.4</a>    |                                                                | External Side Of Plasma Membrane          | TCTGTCTCTCTTCTCTCTGTCATATGCTCCCTCCC       | CD28 antigen                                                                                          |
| Cd34   | <a href="#">NM_001111059.1</a> |                                                                | External Side Of Plasma Membrane          | CTGATATTGCTTAATAATAGCAGCTTTGAGATGACATC    | CD34 antigen                                                                                          |
| Cd36   | <a href="#">NM_007643.3</a>    | fatty acid translocase, FAT, Scarb3                            | External Side Of Plasma Membrane          | GGGACCATGGTGATGAAAAAGCAGAAATGTTCAAAC      | CD36 antigen                                                                                          |
| Cd3d   | <a href="#">NM_013487.2</a>    | T3d                                                            | Membrane, Integral To Membrane,           | CTGTGGAGCTAGACTCGGACCACTGGCTGGTGCAT       | CD3 antigen, delta polypeptide                                                                        |
| Cd3e   | <a href="#">NM_007648.4</a>    | T3e, CD3, CD3epsilon                                           | External Side Of Plasma Membrane          | TGAGTACTGTGGAGGTGGACTCAGCAGCAGTAGCCA      | CD3 antigen, epsilon polypeptide                                                                      |
| Cd3eap | <a href="#">NM_145822.2</a>    | PAF49, Ase1                                                    | Cytoplasm, Nucleus, Mitochondrion,        | ACCTGTCATTAAGCTGCTGCTGGCCCGCTGTTTGAAT     | CD3E antigen, epsilon polypeptide associated protein                                                  |
| Cd4    | <a href="#">NM_013488.2</a>    | L3T4, Ly-4                                                     | External Side Of Plasma Membrane          | AAGAGGTGCTCCGACAAAAGTCCACAAAGACTCAAGC     | CD4 antigen                                                                                           |
| Cd40   | <a href="#">NM_011611.2</a>    | Cd40, p50, Bp50, Tnfrsf5                                       | External Side Of Plasma Membrane          | GCTGCCAAACCCGTTACCTGATTTTGTCCCTGGGACT     | CD40 antigen                                                                                          |
| Cd40lg | <a href="#">NM_011616.2</a>    | CD154, gp39, Ly-62, Cd40L, IMD3,                               | External Side Of Plasma Membrane          | AGCAGTGGATCTGAGAGAATCTTACTCAAGGCGCAAT     | CD40 ligand                                                                                           |
| Cd44   | <a href="#">NM_009851.2</a>    | Ly-24, Pgp-1, HERMES                                           | External Side Of Plasma Membrane          | CATATTGCTCTCCAGCAGTCCAATCCTTAGCATTGCTT    | CD44 antigen                                                                                          |
| Cd46   | <a href="#">NM_010778.3</a>    | CD46, Mcp                                                      | Cell Surface, Extracellular Region, Gc    | TGAGGCCCTCTGTTCTGCTGCTATTTATCTGATGC       | CD46 antigen, complement regulatory protein                                                           |
| Cd48   | <a href="#">NM_007649.4</a>    | Sgp-60, BLAST-1, Bcm-1, BCM1                                   | External Side Of Plasma Membrane          | CTAAGTATTATGTGCTTCAAACAGGGATGGTGTCTG      | CD48 antigen                                                                                          |
| Cd5    | <a href="#">NM_007650.3</a>    | Ly-A, Lyt-1, Ly-12, Ly-1                                       | External Side Of Plasma Membrane          | ACCAGAACATGCTTCCATCGAAGCCACAGCAACTGT      | CD5 antigen                                                                                           |
| Cd53   | <a href="#">NM_007651.3</a>    | Ox-44, Tspan25                                                 | Cell Surface, Membrane, Immunolog         | ATGGCATGATTTCTGGTCAAAAGTTCAATTTCCACC      | CD53 antigen                                                                                          |
| Cd55   | <a href="#">NM_010016.2</a>    | Daf-GPI, complement-glycosylpho                                | External Side Of Plasma Membrane          | ACAGTTAAAGTTTCAAGCAACCCAGCATGTACTGTTAC    | CD55 antigen                                                                                          |
| Cd59b  | <a href="#">NM_181858.1</a>    |                                                                | Cell Surface, Extracellular Space, Pla    | TATATTATGAGCCGATTAGACGTGGCAGGCATACAAAG    | CD59b antigen                                                                                         |
| Cd6    | <a href="#">NM_001037801.2</a> |                                                                | Cell Surface, Membrane, Integral To       | GAAAGTCCCTCCAGATTTCCAGTCAAGTCAAGTCTTCT    | CD6 antigen                                                                                           |
| Cd69   | <a href="#">NM_001033122.3</a> | AIM, VEA                                                       | External Side Of Plasma Membrane          | CTGAAAACCTGTCTATAACGGAAAATAGCTTCCACAT     | CD69 antigen                                                                                          |
| Cd7    | <a href="#">NM_009854.1</a>    |                                                                | Membrane, Integral To Membrane,           | CTCAGGCTACAATGTGATTTACTTTGAAGCCGCGAG      | CD7 antigen                                                                                           |
| Cd74   | <a href="#">NM_001042605.1</a> | CLIP, Ii                                                       | External Side Of Plasma Membrane          | ATGATAACATGCTCCTTGGGCTGTGAAGAAGGTTACC     | CD74 antigen (invariant polypeptide of major histocompatibility complex, class II antigen-associated) |
| Cd79a  | <a href="#">NM_007655.3</a>    | mb-1, Ig alpha, Iga, Ly54, Cd79a, Ij                           | External Side Of Plasma Membrane          | AAATAACAGGAAGTCTCTGGGAAAGTCCCAACCCAA      | CD79A antigen (immunoglobulin-associated alpha)                                                       |
| Cd79b  | <a href="#">NM_008339.2</a>    | B29, Igb, Igbeta, Igb-beta                                     | External Side Of Plasma Membrane          | CAGCCAGAATGGCTGTCTACACCCTCACTACCAA        | CD79B antigen                                                                                         |
| Cd80   | <a href="#">NM_009855.2</a>    | B7-1, Ly-53, Ly53, Cd28l, B7.1                                 | External Side Of Plasma Membrane          | TGGCTTCCCATGTCTTCCAAAGCATCTGAAGCTATC      | CD80 antigen                                                                                          |
| Cd81   | <a href="#">NM_133655.2</a>    | Tspan28, Tapa-1, Tapa1                                         | Membrane, Immunological Synapse           | GGCATCTGGGCTTCGTAACAAAGCAGATCGCCAAG       | CD81 antigen                                                                                          |
| Cd82   | <a href="#">NM_001271430.1</a> | C33, Tspan27, Kai1                                             | Membrane, Integral To Membrane            | CTGAGAATGGGGCAGGCTGTGTCAAAGTCCAAAGT       | CD82 antigen                                                                                          |
| Cd83   | <a href="#">NM_009856.2</a>    |                                                                | External Side Of Plasma Membrane          | CCAGATAGTTAGTCTGGTGAATAACAATGGATGTGAA     | CD83 antigen                                                                                          |
| Cd86   | <a href="#">NM_019388.3</a>    | B7-2, MB7-2, B70, Ly-58, Cd28l2,                               | External Side Of Plasma Membrane          | CAAAACATAAGCCTGAGTGAAGTATTTGGGAC          | CD86 antigen                                                                                          |
| Cd8a   | <a href="#">NM_001081110.2</a> | Ly-B, Ly-2, Ly-35, Lyt-2                                       | External Side Of Plasma Membrane          | CCACCTCTGTTGTATATGCTTATCCCAACAAGAT        | CD8 antigen, alpha chain                                                                              |
| Cd8b1  | <a href="#">NM_009858.2</a>    | Ly-C, Ly-3, Lyt-3                                              | External Side Of Plasma Membrane          | GCCACCTCATGAATAAGTTTTCTGCAACAGTTTCAGG     | CD8 antigen, beta chain 1                                                                             |
| Cd9    | <a href="#">NM_007657.3</a>    | Tspan29                                                        | External Side Of Plasma Membrane          | CAGCTTTGGAAAGTTCCAGGTTAAGCCCTGCCCTGA      | CD9 antigen                                                                                           |
| Cd96   | <a href="#">NM_032465.2</a>    | Tactile                                                        | Membrane, Integral To Membrane            | AACCTGTGGTAGAGTTGAGTTTTGAGCAGCAATAGG      | CD96 antigen                                                                                          |

|         |                                |                                                                       |                                                                                    |
|---------|--------------------------------|-----------------------------------------------------------------------|------------------------------------------------------------------------------------|
| Cd97    | <a href="#">NM_011925.1</a>    | EGF-TM7 receptor                                                      | Membrane,Integral To Membrane,CGTGGCCATCTCAATGGCAGTTGTCAAATGGATGGCTA' CD97 antigen |
| Cd99    | <a href="#">NM_025584.2</a>    | D4, p1lr-1                                                            | Membrane,Integral To Membrane CCGCCGTGAAATCACCGCTGCACCGCCCTCGCCGCTGC CD99 antigen  |
| Cdh5    | <a href="#">NM_009868.3</a>    | 7B4/cadherin-5, VE-cadherin, VEC Cell Junction,Tight Junction,Interce | CAGCAACTCACCCCTATAAACACCATGACAACACCGCC cadherin 5                                  |
| Cdkn1a  | <a href="#">NM_007669.4</a>    | Waf1, P21, CIP1, SDI1, CAP20, md                                      | Cytoplasm,Nucleus,Cytosol,Negativ                                                  |
| Ceacam1 | <a href="#">NM_001039185.1</a> | CD66a, mmCGM2, mCEA1, mmCG                                            | Membrane,Integral To Membrane, CAAGGGAAACACTACGGCTATAGACAAGAAATGGACCC              |
| Cebpb   | <a href="#">NM_009883.3</a>    | NF-IL6, C/EBP BETA, IL-6DBP, LAP,                                     | Cytoplasm,Nucleus,Nuclear Matrix,CGGGCACC                                          |
| Cfb     | <a href="#">NM_008198.2</a>    | Factor B, B, alternative-comple                                       | Extracellular Region,Extracellular S                                               |
| Cfd     | <a href="#">NM_013459.1</a>    | DF, D component (adipsin) of com                                      | Extracellular Region,Extracellular S                                               |
| Cfh     | <a href="#">NM_009888.3</a>    | Sas-1, Mud-1, Sas1                                                    | Cytoplasm,Nucleus,Extracellular Sp                                                 |
| Cfi     | <a href="#">NM_007686.2</a>    |                                                                       | Extracellular Region,Membrane,Pr                                                   |
| Cfp     | <a href="#">NM_008823.3</a>    | Pfc                                                                   | Extracellular Region,Innate Immuni                                                 |
| Chuk    | <a href="#">NM_001162410.1</a> | Chuk1, IKK-alpha, IKK[a], IKK1, IKK                                   | Cytoplasm,Nucleus,Cytosol,Micros                                                   |
| Ciita   | <a href="#">NM_007575.2</a>    | C2ta, Gm9475                                                          | Nucleus,Positive Regulation Of Trar                                                |
| Cish    | <a href="#">NM_009895.3</a>    | F23, Cis, CIS1, cytokine-inducible                                    | Plasma Membrane,Regulation Of                                                      |
| Clec4a4 | <a href="#">NM_001005860.2</a> | Dcir2                                                                 | Sugar Binding,Receptor Activity                                                    |
| Clec4e  | <a href="#">NM_019948.2</a>    | Mincle, Clec5f9                                                       | Membrane,Integral To Membrane, C                                                   |
| Clec5a  | <a href="#">NM_001038604.1</a> | Ly100, MDL-1, myeloid DAP12-ass                                       | Cell Surface,Membrane,Integral To                                                  |
| Clu     | <a href="#">NM_013492.2</a>    | Sgp-2, complement lysis inhibitor                                     | Extracellular Region,Membrane, C                                                   |
| Cmklr1  | <a href="#">NM_008153.3</a>    | Gpcr27, ChemR23                                                       | Membrane,Integral To Membrane, T                                                   |
| Cr2     | <a href="#">NM_007758.2</a>    | CD21, CD35, Cr-1, Cr-2, Cr1, C3DR                                     | External Side Of Plasma Membrane                                                   |
| Cradd   | <a href="#">NM_009950.2</a>    | RAIDD                                                                 | Signal Transduction,Regulation Of                                                  |
| Crif2   | <a href="#">NM_001164735.1</a> | Ly114, Tslpr, Tpte2                                                   | Extracellular Region,Membrane,Int                                                  |
| Csf1    | <a href="#">NM_001113530.1</a> | M-CSF, CSF-1, colony-stimulating                                      | Extracellular Region,Membrane,Pei                                                  |
| Csf1r   | <a href="#">NM_001037859.1</a> | CD115, M-CSFR, CSF-1R, Fms, Csf                                       | Cell Surface,Membrane,Integral To                                                  |
| Csf2    | <a href="#">NM_009969.4</a>    | Gm-CSf, Csfgm, MGI-IGM, GMCSF                                         | Extracellular Region,Extracellular S                                               |
| Csf2rb  | <a href="#">NM_007780.4</a>    | AIC2B, CDw131, common beta ch                                         | Membrane,Integral To Membrane, A                                                   |
| Csf3r   | <a href="#">NM_001252651.1</a> | G-CSFR, Csfgr, Cd114                                                  | Membrane,Integral To Membrane, C                                                   |
| Ctla4   | <a href="#">NM_009843.3</a>    | CH29-120A16.2, Cd152, Ctla-4, Ly-56                                   | TGGACTGAGGTCCTGCAACCACTGGCT                                                        |
| Ctnnb1  | <a href="#">NM_007614.2</a>    | beta-catenin, Ctnnb, beta catenin                                     | Adherens Junction,Cell Junction,Int                                                |
| Ctsc    | <a href="#">NM_009982.2</a>    | DPP1, DPP1, dipeptidylpeptidase                                       | 1 Golgi Apparatus,Endoplasmic Retic                                                |
| Ctsg    | <a href="#">NM_007800.1</a>    |                                                                       | Membrane,Intermediate Filament,                                                    |
| Ctss    | <a href="#">NM_021281.2</a>    | Cat 5                                                                 | Cell Surface,Membrane,Lysosome,I                                                   |
| Cul9    | <a href="#">NM_001081335.2</a> | Parc                                                                  | AAGATGCTGGCCATTGCTAATTCCTCCG                                                       |
| Cx3cl1  | <a href="#">NM_009142.3</a>    | fractalkine, CX3C, neurotactin, D8                                    | Cell Surface,Extracellular Region,M                                                |
| Cx3cr1  | <a href="#">NM_009987.3</a>    |                                                                       | Membrane,Perinuclear Region Of                                                     |
| Cxcl1   | <a href="#">NM_008176.1</a>    | N51, Mgsa, Fsp, Gro1, Scyb1, KC/                                      | Extracellular Region,Extracellular S                                               |
| Cxcl10  | <a href="#">NM_021274.1</a>    | CRG-2, IP-10, Ili10, mob-1, INP10,                                    | External Side Of Plasma Membrane                                                   |
| Cxcl11  | <a href="#">NM_019494.1</a>    | betaR1, H174, SCYB9B, IP9, ITAC,                                      | Extracellular Region,Extracellular S                                               |
| Cxcl12  | <a href="#">NM_021704.3</a>    | Sdf1a, Sdf1b, SDF-1, PBSF/SDF-1,                                      | External Side Of Plasma Membrane                                                   |
| Cxcl13  | <a href="#">NM_018866.2</a>    | BLC, BCA-1, ANGIE2, Scyb13                                            | Extracellular Region,Extracellular S                                               |
| Cxcl15  | <a href="#">NM_011339.2</a>    | lungkine, weche, Scyb15                                               | Extracellular Region,Extracellular S                                               |
| Cxcl3   | <a href="#">NM_203320.2</a>    | Dcip1                                                                 | Extracellular Region,Extracellular S                                               |
| Cxcl9   | <a href="#">NM_008599.2</a>    | Mig, CMK, crg-10, Scyb9                                               | External Side Of Plasma Membrane                                                   |
| Cxcr1   | <a href="#">NM_178241.4</a>    | Il8ra                                                                 | Membrane,Integral To Membrane, T                                                   |
| Cxcr2   | <a href="#">NM_009909.3</a>    | CD128, IL-8Rb, IL-8rb, Gpcr16, Cm                                     | Cell Surface,Membrane,Integral To                                                  |
| Cxcr3   | <a href="#">NM_009910.2</a>    | Cxcr3, Cmkar3, Cd183                                                  | External Side Of Plasma Membrane                                                   |
| Cxcr4   | <a href="#">NM_009911.3</a>    | fusin, PB-CKR, CD184, Cmkar4, Sd                                      | External Side Of Plasma Membrane                                                   |
| Cxcr5   | <a href="#">NM_007551.2</a>    | Gpcr6, CXCR-5, Blr1                                                   | Membrane,Integral To Membrane, A                                                   |
| Cxcr6   | <a href="#">NM_030712.4</a>    | BONZO, STRL33                                                         | Membrane,Integral To Membrane, A                                                   |
| Cybb    | <a href="#">NM_007807.2</a>    | gp91phox, gp91<phox>, Nox2, Cgr                                       | Golgi Apparatus,Membrane,Cytopl.                                                   |
| Ddx58   | <a href="#">NM_172689.3</a>    | RIG-I                                                                 | Cytoplasm,Response To Virus,Posit                                                  |
| Defb1   | <a href="#">NM_007843.3</a>    | mBD-1                                                                 | Extracellular Region,Soluble Fractio                                               |
| Defb14  | <a href="#">NM_183026.2</a>    | mBD14                                                                 | Extracellular Region,Defense Resp                                                  |
| Dpp4    | <a href="#">NM_001159543.1</a> | THAM, Cd26, Dpp-4                                                     | Cell Surface,Cell Junction,Extracel                                                |
| Ebi3    | <a href="#">NM_015766.2</a>    | IL-27, EBI-3                                                          | Extracellular Region,Membrane,Ext                                                  |
| Emr1    | <a href="#">NM_010130.1</a>    | DD7A5-7, F4/80, TM7LN3, EGF-TM                                        | External Side Of Plasma Membrane                                                   |
| Entpd1  | <a href="#">NM_009848.3</a>    | NTPDase-1, Cd39, ectoapyrase                                          | Membrane,Basal Lamina,Integral T                                                   |
| Eomes   | <a href="#">NM_010136.2</a>    | Tbr2                                                                  | Nucleus,Positive Regulation Of Cell                                                |
| Ets1    | <a href="#">NM_001038642.1</a> | Ets-1, Tpl1, p42Ets-1, p51Ets-1                                       | Nucleus,Transcription Factor Comp                                                  |
| Fadd    | <a href="#">NM_010175.5</a>    | Mort1/FADD                                                            | Cytoplasm,Lipid Raft,Protein Comp                                                  |
| Fas     | <a href="#">NM_007987.2</a>    | CD95, APO-1, TNFR6, Tnfrsf6                                           | External Side Of Plasma Membrane                                                   |
| FasL    | <a href="#">NM_010177.3</a>    | Fas-L, CD178, APT1LG1, CD95L, Tr                                      | External Side Of Plasma Membrane                                                   |
| Fcacr   | <a href="#">NM_001170632.1</a> |                                                                       | Membrane,Integral To Membrane, C                                                   |
| Fcgr1a  | <a href="#">NM_010184.1</a>    | Fce1a, Fcr-5, FcERI                                                   | External Side Of Plasma Membrane                                                   |

|          |                                |                                                                            |                                                                                                                                                                  |
|----------|--------------------------------|----------------------------------------------------------------------------|------------------------------------------------------------------------------------------------------------------------------------------------------------------|
| Fcgr1g   | <a href="#">NM_010185.4</a>    | FcR[ $\gamma$ ], FcR-gamma, Ly-50, Fce1g, External Side Of Plasma Membrane | CTATAGCCAGCCGTGAGAAAGCAGATGCTGTCTACACGG Fc receptor, IgE, high affinity I, gamma polypeptide                                                                     |
| Fcgr1    | <a href="#">NM_010186.5</a>    | CD64, FcgammaRI                                                            | External Side Of Plasma Membrane GAGACAGTTCACACAATGGTTTATCAACGGAAACAGCCG Fc receptor, IgG, high affinity I                                                       |
| Fcgr2b   | <a href="#">NM_010177189.1</a> | CD32, Fc[ $\gamma$ ]RII, Fc $\gamma$ RII, Fc gamma F                       | External Side Of Plasma Membrane TTGGTTCCTCAATGGTTGACTGTACTAATGACTCCCAATAAC Fc receptor, IgG, low affinity IIb                                                   |
| Fcgr3    | <a href="#">NM_010188.5</a>    | CD16, Fc $\gamma$ receptor III, FcgammaRII                                 | Signal Transduction,Cell Surface Re TCGACTCTCCACCATCCACCATGGCAGGTGCACAATAAA Fc receptor, IgG, low affinity III                                                   |
| Fcgr4    | <a href="#">NM_144559.1</a>    | CD16-2, FcgammaRIV, Fcgr3a                                                 | External Side Of Plasma Membrane GGCGATCCAGGGTCTCCATCCATGTTTCCACCGTGGCAGT Fc receptor, IgG, low affinity IV                                                      |
| Fcgrt    | <a href="#">NM_010189.3</a>    | FcRn, neonatal Fc receptor                                                 | Membrane,Integral To Membrane, GCCTCGGATAATTCCTCAGTGGCCACGGCTGTGTTGCC Fc receptor, IgG, alpha chain transporter                                                  |
| Fkbp5    | <a href="#">NM_010220.3</a>    | FKBP51, Dit1, D17ErtD592e                                                  | Membrane,Cytoplasm,Nucleus,Pro ACAGACTCTGTGTTCTCCCAAGCCCGCTATTAGTGACA FK506 binding protein 5                                                                    |
| Fn1      | <a href="#">NM_010233.1</a>    | Fn-1, Fn                                                                   | Proteinaceous Extracellular Matrix, TCCAGACCTACCTGGACCAAGTGTGATGACTTCCATT fibronectin 1                                                                          |
| Folr4    | <a href="#">NM_022888.2</a>    | Folp3                                                                      | Extracellular Region,Membrane Fra GCACAGTGGTGGCAGATCCTCTGGGGTGTGGGCAGT folate receptor 4 (delta)                                                                 |
| Foxp3    | <a href="#">NM_054039.1</a>    | JM2, scurfin                                                               | Cytoplasm,Nucleus,Transcription F:CCAGTCCCGCAACTTCTCTGACTCTGCCTCAGACGA forkhead box P3                                                                           |
| Frmppd4  | <a href="#">NM_01033330.2</a>  | LOC237234, Pd2k10, Pd2d10                                                  | Cytoskeleton,Cell Projection,Lipid ETCCATCTGCTACCATCAAAATTCACCTTGGAAATCAAAG FERM and PDZ domain containing 4                                                     |
| Fyn      | <a href="#">NM_008054.2</a>    | Src Kinase p59                                                             | Membrane,Microsome,Endosome, TTCTTATCCGCGAGAGCCAAACCAAAAGGTGCCTACT Fyn proto-oncogene                                                                            |
| Gata3    | <a href="#">NM_008091.3</a>    | Gata-3                                                                     | Nucleus,Nuclear Chromatin,Nucleo CATGCGTGAGGAGTCTCCAAGTGTGGCAAGAGTTCCTCC GATA binding protein 3                                                                  |
| Gfi1     | <a href="#">NM_010278.2</a>    | Pal-1, Pal1, Gfi-1                                                         | Nucleus,Nuclear Matrix,Nuclear Bo AAGACTCATCATGGTTAGTCCCTTCCACTTCTTCCCGC growth factor independent 1                                                             |
| Gm10499  | <a href="#">XM_003086920.1</a> |                                                                            | AGCCATGGCTGTTCTTGTTCCTGGAGCTGTGATCAT predicted gene 10499                                                                                                        |
| Gp1bb    | <a href="#">NM_010327.2</a>    |                                                                            | Membrane,Integral To Membrane, ACCCGAGCTCTGCAAGCCTGAATCAACATGGTGCCAAAC glycoprotein Ib, beta polypeptide                                                         |
| Gpi1     | <a href="#">NM_008155.3</a>    | Org, Gpi-1, Gpi-1t, Gpi-1s, Gpi-1r,                                        | Extracellular Region,Cytoplasm,Nuc CAGGGATGAATCGATTATACCTTCAAAGACAGTTTTA glucose phosphate isomerase 1                                                           |
| Gpr183   | <a href="#">NM_183031.2</a>    | Ebi2                                                                       | Membrane,Integral To Membrane, CAGCCAGGTATAATGCCTCTGCATTACAGCCTGGTCTT G protein-coupled receptor 183                                                             |
| Gpr44    | <a href="#">NM_009962.2</a>    | Crth2, PGD2 receptor                                                       | Membrane,Integral To Membrane, GAAGCCGCTCTGCCACTTTGGAGGAGATGGTCCAGCT G protein-coupled receptor 44                                                               |
| Gzma     | <a href="#">NM_010370.2</a>    | Hanukah factor, BLT esterase, TSP                                          | Extracellular Region,Negative Regu CTGTGCTGGCGCTTTGATTGAAAAGAACTGGGTGTTGAC granzyme A                                                                            |
| Gzmb     | <a href="#">NM_013542.2</a>    | CCP-1/C11, CCP1, CtlA-1, CtlA1, Gz                                         | Cytoplasm,Proteolysis,Apoptosis GiTTCTGCCACATGCTGTGACAAACCAACTGACATCTCTCT granzyme B                                                                             |
| H2-Aa    | <a href="#">NM_010378.2</a>    | A alpha, Aalpha, Ia-1, Ia1, H-2Aa, I                                       | External Side Of Plasma Membrane TCAGAAATAGCAAGTCACTGCAGACGGTGTATGAGA histocompatibility 2, class II antigen A, alpha                                            |
| H2-Ab1   | <a href="#">NM_207105.2</a>    | Abeta, A beta, H-2Ab, Ia-2, H2-Ab,                                         | External Side Of Plasma Membrane AAGCATTTCGTGACCAAGTTCATGGGGAGTGCCTACT histocompatibility 2, class II antigen A, beta 1                                          |
| H2-DMa   | <a href="#">NM_010386.3</a>    | H2-Ma, H-2Ma, H2-M alpha                                                   | Late Endosome,Membrane,Integra AGCTGTCCATGGGCTGACCTCCAGGCTTCTCTTATTA histocompatibility 2, class II, locus DMa                                                   |
| H2-DMb2  | <a href="#">NM_010388.4</a>    | H2-Mb2, H-2Mb2, H2-M beta2                                                 | Late Endosome,Membrane,Integra TTTGGGGTGTCTAGATTGGCTGAAATAATTTCAAATA histocompatibility 2, class II, locus Mb2                                                   |
| H2-Ea-ps | <a href="#">NM_010381.2</a>    | H-2Ea, Ia-3, Ia3, I-Alpha                                                  | ATCATGAAGGGTATTAATAAACGCAATGTTGAGAACGC histocompatibility 2, class II antigen E alpha, pseudogene                                                                |
| H2-Eb1   | <a href="#">NM_010382.2</a>    | H-2Eb, Ia-4, Ia4                                                           | External Side Of Plasma Membrane AAACATGTCTGCTTGGCCACATCCCTCCAGAGACT histocompatibility 2, class II antigen E beta                                               |
| H2-K1    | <a href="#">NM_01001892.2</a>  | H-2K, H-2K(d), H2-K, K-f                                                   | TCTTCCCTCCACAGCCAACCTTGCTGGTTCAGCCAAACA histocompatibility 2, K1, K region                                                                                       |
| H2-Ob    | <a href="#">NM_010389.3</a>    | H-2I, Ob, H2-IAb2, H2-Ab, H-2Ob,                                           | Membrane,Integral To Membrane, GGCAACCGCAGTGAAGTATAATCAATGACTTGTTCAG histocompatibility 2, O region beta locus                                                   |
| H2-Q10   | <a href="#">NM_010391.4</a>    | H-2Q10, Q10, Qa10                                                          | TGAGCCCTCACCTGAGATGGAACTCCCTCCACT histocompatibility 2, Q region locus 10                                                                                        |
| H60a     | <a href="#">NM_010400.2</a>    |                                                                            | External Side Of Plasma Membrane GGGCAAGGAGTTGGCAGTTTTCAAAGTAATAGGAAT histocompatibility 60a                                                                     |
| Hamp     | <a href="#">NM_032541.1</a>    | Hamp1, Hepc, Hepc1                                                         | AAGAGAGACCAACTTCCCCATCTGATCTTCTGTGTA hepcidin antimicrobial peptide                                                                                              |
| Hc       | <a href="#">NM_010406.1</a>    | C5a, C5, He                                                                | Extracellular Region,Extracellular S CTACACACTGAATTTGGTCTACTCTCTTTCTGTAAG hemolytic complement                                                                   |
| Hcst     | <a href="#">NM_011827.3</a>    | DAP10, KAP10                                                               | Membrane,Integral To Membrane CATCGCAGTCTTCTGCTCCGATGTGGGACTCTGTCT hematopoietic cell signal transducer                                                          |
| Hfe      | <a href="#">NM_010424.4</a>    | MR2                                                                        | Membrane,Cytoplasmic Vesicle,Ear TTGTTTCCACTCTGAAGAAAGTTGGAACCTTCAATCCGG hemochromatosis                                                                         |
| Hif1a    | <a href="#">NM_010431.1</a>    | MOP1, HIF-1alpha, HIF1alpha, bHI                                           | Cytoplasm,Nucleus,Transcription F:AGCTCATCAAGAGGCCCTTAAGTGTCTGCCACTTTGAAT hypoxia inducible factor 1, alpha subunit                                              |
| Hlx      | <a href="#">NM_008250.2</a>    | Hlx1                                                                       | Nucleus,Positive Regulation Of Cell GGACTTTGTGCTACTTAAAGTGGTGGCGAGGGTGGCC H2.0-like homeobox                                                                     |
| Icam1    | <a href="#">NM_010493.2</a>    | MALA-2, CD54, Icam-1, Ly-47                                                | External Side Of Plasma Membrane ACATGGCTCGAGGGTCTCTACTGGTCAGGATGCTTTI intercellular adhesion molecule 1                                                         |
| Icam2    | <a href="#">NM_010494.1</a>    | CD102, Icam-2                                                              | Membrane,Integral To Membrane, GAAGTGGAAACAGTCTTAGTCTCAAAGTCTCAAAGA intercellular adhesion molecule 2                                                            |
| Icam4    | <a href="#">NM_023892.2</a>    | Cd242                                                                      | Extracellular Region,Membrane,int GGATTCTTGGTGGTGGAGCTGAGAAGAGTGGCGAGT intercellular adhesion molecule 4, Landsteiner-Wiener blood group                         |
| Icam5    | <a href="#">NM_008319.2</a>    | CD50, Tlcn, TLN, Icam3                                                     | Plasma Membrane,Phagocytosis GTTTTCTGTGAAGTTGATGGGAAGCCAGAACCTGTI intercellular adhesion molecule 5, telencephalin                                               |
| Icos     | <a href="#">NM_017480.1</a>    |                                                                            | External Side Of Plasma Membrane TTCACAATGGAGGTGACAGATTCTTGTAAATACCTGA inducible T cell co-stimulator                                                            |
| Icosl    | <a href="#">NM_015790.3</a>    | GL50, B7h, ICOS-L, B7RP-1, LICOS,                                          | External Side Of Plasma Membrane CCCCACAGAGCCATTTCAACTGTAGTGGTCTGATGTCT icos ligand                                                                              |
| Ifi204   | <a href="#">NM_008329.2</a>    | Ifi16, p204                                                                | TGTTTTCCACTGAAAACAATTGACAGGCAACCAAAGTTAC interferon activated gene 204                                                                                           |
| Ifi35    | <a href="#">NM_027320.4</a>    | IFP35                                                                      | Nucleus GTCTCTCCTATGTGAGTGGTGAATCCAGAAAGCCGAG interferon-induced protein 35                                                                                      |
| Ifih1    | <a href="#">NM_027835.2</a>    | Helicard, MDA-5, MDA5                                                      | Cytoplasm,Nucleus,Response To Vi GCTGTAAGACGGAAATCGCAAGATCGCGTCTGTGCA interferon induced with helicase C domain 1                                                |
| Ifit2    | <a href="#">NM_008332.2</a>    | Ifi54                                                                      | Response To Virus ACAACGAGTAAGGAGTCACTGGAGAGCAATCTGCACAT interferon-induced protein with tetraatricopeptide repeats 2                                            |
| Ifitm1   | <a href="#">NM_001112715.1</a> | frangilis2, Mil2                                                           | Membrane,Integral To Membrane, CCTCACCGCAAAGTGGCTGAACATCAGCTCCCTGTTCTT interferon induced transmembrane protein 1                                                |
| Ifna1    | <a href="#">NM_010502.2</a>    | RP23-360M23.1, Ifa1                                                        | CTGCAAGGCTGTGATGCAGCAGGTGGGGTGCAGGA interferon alpha 1                                                                                                           |
| Ifna2    | <a href="#">NM_010503.2</a>    | RP23-139P14.4, Ifa2                                                        | TAACCTCAAGAAACAAGGGCTTGAAGCTCTGGCACA interferon alpha 2                                                                                                          |
| Ifnar1   | <a href="#">NM_010508.1</a>    | Ifrc, Ifar, IFN-alpha/betaR                                                | Membrane,Integral To Membrane, TGGGAAACAACCTTCAATACTAAGATAAGCATGGAGAAG interferon (alpha and beta) receptor 1                                                    |
| Ifnar2   | <a href="#">NM_001110498.1</a> | Ifnar-2                                                                    | Extracellular Region,Membrane,int TCCTCTTGGAGCCGAGAAATTTGAGATCGTTGGCTTACA interferon (alpha and beta) receptor 2                                                 |
| Ifnb1    | <a href="#">NM_010510.1</a>    | interferon beta 1, fibroblast, Ifb,                                        | Extracellular Region,Extracellular S GATGAACCTCCACAGCAGCAGTGTCTTCTGAAGACAGTA interferon beta 1, fibroblast                                                       |
| Ifng     | <a href="#">NM_008337.1</a>    | IFN-gamma, Ifg                                                             | External Side Of Plasma Membrane CTAGCTCTGAGCAATGAACGCTACACACTGCATCTTGGC interferon gamma                                                                        |
| Ifngr1   | <a href="#">NM_010511.2</a>    | CD119, Nktar, Ifgr, Ifngr, IFN-gamI                                        | Membrane,Endoplasmic Reticulum AAGCATATTTACTAAGTCTTGTCTCTGTGGTAAAAA interferon gamma receptor 1                                                                  |
| Ifngr2   | <a href="#">NM_008338.3</a>    | Ifgt, Ifgr2                                                                | Endoplasmic Reticulum,Plasma Me CATCTGATCCGTTGGCCATCTCGCATTGTGCTGGC interferon gamma receptor 2                                                                  |
| Ifgzr    | <a href="#">NM_010515.1</a>    | Mpr300, IGF-II/CI-MPR, CI-MPR, I,                                          | Cell Surface,Late Endosome,Mem TGACTCTCTGGCAGATGAAATGAAATCATGAGGG insulin-like growth factor 2 receptor                                                          |
| Ikkap    | <a href="#">NM_026079.3</a>    | Elp1, C78473, IKAP                                                         | Cytoplasm,Nucleus,Dna Directed Ri GCTGGCCCTTCTGTGCTACTGGCTGTTCCGCTTC inhibitor of kappa light polypeptide enhancer in B cells, kinase complex-associated protein |
| Ikkbb    | <a href="#">NM_010546.2</a>    | IKK2, IKK-2, IKK-beta, IKK[b], IKKb                                        | Membrane,Cytoplasm,Nucleus,Mic GTGTGTGTGTAATAAGCAAAAACCGGCTCAGGTTATCATA inhibitor of kappaB kinase beta                                                          |
| Ikkbe    | <a href="#">NM_019777.3</a>    | IKK-i, IKKepsilon                                                          | Cytoplasm,Nucleus,Pml Body,Dna I TCTGACTCCTGGGGTTCACAAGGCACTCAGAAGCAA inhibitor of kappaB kinase epsilon                                                         |
| Ikkbg    | <a href="#">NM_178590.2</a>    | IKK[g], NEMO                                                               | Cytoplasmic Part,Cytoplasm,Nucleu TGCCAACAGATGGCTGAGGCAAGCCCTGTGAAAGCT inhibitor of kappaB kinase gamma                                                          |
| Ikzf1    | <a href="#">NM_001025597.1</a> | LyF-1, Ikaros, Zfpn1a1                                                     | Nucleus,Transcription Factor Comp GATTCCAGTCCCTCAAGTGTGTTTAAAGTAGTATCAG IKAROS family zinc finger 1                                                              |
| Ikzf2    | <a href="#">NM_011770.4</a>    | Helios, Zfpn1a2                                                            | Nucleus,Positive Regulation Of Trar AATTATGGAACGTGATCTAAAACGGTTTGACAGTGA IKAROS family zinc finger 2                                                             |
| Ikzf3    | <a href="#">NM_011771.1</a>    | Aiolos, Zfpn1a3                                                            | Cytoplasm,Nucleus,Transcription D TGATGGTTCATAAGGCAAGCCATACCGGCAACGCCCTG IKAROS family zinc finger 3                                                             |

|         |                                |                                      |                                       |                                                                                   |
|---------|--------------------------------|--------------------------------------|---------------------------------------|-----------------------------------------------------------------------------------|
| lkzf4   | <a href="#">NM_011772.2</a>    | Eos, Zfpn1a4                         | Nucleus,Transcription Dna Depend      | CACCCACTGGCCGCTCACTTACACACTTACTCAACCCGTIKAROS family zinc finger 4                |
| Il10    | <a href="#">NM_010548.1</a>    | cytokine synthesis inhibitory fact   | Extracellular Region,Extracellular S  | GGGCCCTTTGCTATGGTGTCTTCAATTGCTCTCATCCCT interleukin 10                            |
| Il10ra  | <a href="#">NM_008348.2</a>    | mIL-10R, Il10r, CDw210               | Membrane,Cytoplasm,Integral To M      | TGTTGTCCGCTTTGCTCCCATCTCTGTCACGATCCAGC interleukin 10 receptor, alpha             |
| Il10rb  | <a href="#">NM_008349.5</a>    | CRF2-4, D21558h, D16H21558, Crf      | Receptor Activity                     | CTTTACACTCGCTTTCTCAGCCCAAAATGAGAATGA interleukin 10 receptor, beta                |
| Il11ra1 | <a href="#">NM_010549.3</a>    | NR1, Il11ra, Il-11ra, Il-11ra-alpha  | Membrane,Integral To Membrane,        | GGGTCCCAACTCAGTGGAGCGGAGACAGTCTTAGC interleukin 11 receptor, alpha chain 1        |
| Il12a   | <a href="#">NM_008351.1</a>    | IL-12p35, p35                        | Extracellular Region,Cytoplasm,Exti   | TCATGAAGACATCACCGGGACAAACCAGCACATGAA interleukin 12a                              |
| Il12b   | <a href="#">NM_008352.1</a>    | IL-12p40, IL-12 p40, IL-12b, IL-23 s | Extracellular Region,Membrane,CyT     | CTGTAGAGAAACATCTACCGAAGTCCAATGCAAAGCGC interleukin 12b                            |
| Il12rb1 | <a href="#">NM_008353.2</a>    | IL-12R[b], CD212                     | External Side Of Plasma Membrane      | GGAGTCACTCCCAAGCCTTTAGCTTTGAGGTGCAGATTC interleukin 12 receptor, beta 1           |
| Il12rb2 | <a href="#">NM_008354.3</a>    | IL-12RB2, Ifnm                       | External Side Of Plasma Membrane      | CTTCTGCACCCTCACTAACATAGTGGACTATGTGG interleukin 12 receptor, beta 2               |
| Il13    | <a href="#">NM_008355.2</a>    | IL-13                                | External Side Of Plasma Membrane      | AGCTACACAAAGCACTGTTCCGCCAGGCCCTTCAAT interleukin 13                               |
| Il13ra1 | <a href="#">NM_133990.4</a>    | CD213a1                              | Membrane,Integral To Membrane,        | CTCAACCAGCACCACATAATATTTTAGAGGTTGAAGAGG interleukin 13 receptor, alpha 1          |
| Il15    | <a href="#">NM_008357.2</a>    |                                      | Extracellular Region,Cytoplasm,Exti   | CTTGCAACAGCACTGTCTTCTAACAGAATGTAGCAG interleukin 15                               |
| Il15ra  | <a href="#">NM_008358.2</a>    |                                      | Extracellular Region,Golgi Apparatu   | CTTTCTGGCTGGTACATCAAATCAAGGCAGCCTTCTCA interleukin 15 receptor, alpha chain       |
| Il16    | <a href="#">NM_010551.3</a>    |                                      | Extracellular Region,Cytoplasm,Nur    | TGCGAGACAAAGCTGTGGATGAAAAGGCCAGTAAGCTI interleukin 16                             |
| Il17a   | <a href="#">NM_010552.3</a>    | Ctla-8, Ctla8, Il17                  | External Side Of Plasma Membrane      | ACCTCAAAGCTTTAACTCCCTGGCGCAAAAGTGAGCTC interleukin 17A                            |
| Il17b   | <a href="#">NM_019508.1</a>    | Zcyto7                               | Extracellular Region,Extracellular S  | CCATGGGGCTACAGCATCAACCAGCAGCCAGCCGATCI interleukin 17B                            |
| Il17f   | <a href="#">NM_145856.2</a>    |                                      | Extracellular Region,Extracellular S  | TGTGAAGCCGATCTCCAAGCTTTATGCTTTTAGGACTI interleukin 17F                            |
| Il17ra  | <a href="#">NM_008359.1</a>    | VDw217, Il17r                        | Membrane,Integral To Membrane,        | CCCAAAAACCTGACCCGCTCTTCCCAAAAACATCTATA interleukin 17 receptor A                  |
| Il17rb  | <a href="#">NM_019583.3</a>    | Evi27, IL-17Rh1, IL17RH1, IL-17ER,   | Cell Surface,Extracellular Region,M   | GAGTTTTCAATTTTGATGAACATAAGCTGGATACTCCGGC interleukin 17 receptor B                |
| Il17re  | <a href="#">NM_001034029.1</a> | Il25r                                | Extracellular Region,Membrane,CyT     | GGCTTCAGTGGGGCTGGTCCCTCTTGGTGAGGAA interleukin 17 receptor E                      |
| Il18    | <a href="#">NM_008360.1</a>    | IL-18, Igif                          | Extracellular Region,Cytoplasm,Exti   | ACTTGGCCGACTTCACTGTACAACCCAGTAATACGGA interleukin 18                              |
| Il18r1  | <a href="#">NM_001161842.1</a> | Il18rp, Il18ralpha                   | Intrinsic To Membrane,Membrane,       | AGATGGTCAAAGCAGTGTCTCACATGATAGAGAG interleukin 18 receptor 1                      |
| Il18rap | <a href="#">NM_010553.2</a>    | AcPL accessory protein-like)         | Intrinsic To Membrane,Membrane,       | CTTGAAGTCGGTCCAGCCAGTCCAGGTTCTGGACCA interleukin 18 receptor accessory protein    |
| Il19    | <a href="#">NM_001009940.1</a> |                                      | Extracellular Region,Extracellular S  | TCTAGGAGAACTGAACATCTTTAGCCTGGATTGACAG interleukin 19                              |
| Il1a    | <a href="#">NM_010554.4</a>    | IL-1a                                | Cell Surface,Extracellular Region,Cy  | ACTCTGAAACGTCAAAGATGTCCAACCTCACCTCAAGG interleukin 1 alpha                        |
| Il1b    | <a href="#">NM_008361.3</a>    | IL-1B, IL-1beta                      | Extracellular Region,Vesicle,Secret   | GTTGATCAAGGGGACATTAGGCAGCACTCTAGAAACA interleukin 1 beta                          |
| Il1r1   | <a href="#">NM_001123382.1</a> | CD121a, IL-1 receptor alpha chain    | Cell Surface,Extracellular Region,Ini | CTTCTGGAGTAAAAGATAAAGTGGTGGGAAATGI interleukin 1 receptor, type I                 |
| Il1r2   | <a href="#">NM_010555.4</a>    | CD121b, IL-1 receptor beta chain,    | Extracellular Region,Membrane,Int     | GGGAGGATCTGCATACAGATTTTAAATGTGTGCTCGA interleukin 1 receptor, type II             |
| Il1rap  | <a href="#">NM_134103.2</a>    | IL-1R AcP, IL-1RAcP                  | Extracellular Region,Intrinsic To M   | eGAGAAAGAACAGGAGGAACTGGTATTCCCTCGCAA interleukin 1 receptor accessory protein     |
| Il1r1f  | <a href="#">NM_001025602.2</a> | T1 gene, T1, T1/ST2, ST2, DER4, FI   | External Side Of Plasma Membrane      | ATAGGAAACCAGCAAGTATTGCCTGTCCAGCTTGCCTT interleukin 1 receptor-like 1              |
| Il1r2f  | <a href="#">NM_133193.3</a>    |                                      | Intrinsic To Membrane,Membrane,       | AGGAAGTTGAGTATGGAAGAAGGATCCCTAACATCAGT interleukin 1 receptor-like 2              |
| Il1rn   | <a href="#">NM_031167.5</a>    | IL-1ra                               | Extracellular Region,Cytoplasm,Ves    | CAACCAGCTCATTGCTGGTACTTACAAGGACCAATATC interleukin 1 receptor antagonist          |
| Il2     | <a href="#">NM_008366.2</a>    | IL-2                                 | Extracellular Region,Extracellular S  | CGCAACTGGTGGACTTTCTGAGGAGATGGATAGCCTC interleukin 2                               |
| Il20    | <a href="#">NM_021380.1</a>    | Zcyto10                              | Extracellular Region,Extracellular S  | CACCACCTCCAGAAAGATCAGCAGCCTCGCAACTC interleukin 20                                |
| Il21    | <a href="#">NM_021782.2</a>    |                                      | Extracellular Region,Extracellular S  | ATGGCTGGGGATGTTTTGATCTAAGGAAAAAGGTGI interleukin 21                               |
| Il21r   | <a href="#">NM_021887.1</a>    | NILR                                 | Membrane,Integral To Membrane,        | TATGGTACAGTGCATATGCGCTTGTCTCAATTCTGTCT interleukin 21 receptor                    |
| Il22    | <a href="#">NM_016971.1</a>    | mCG_123110, IL-22, IL-22a, ILTifa,   | Il1f                                  | AGAAGAATGTCAAAGGCTGAAGGAGACAGTGAAGAAAG interleukin 22                             |
| Il22ra2 | <a href="#">NM_178258.5</a>    | IL-22bp                              | Extracellular Region,Cytosol,Cytki    | TAAGCATTCCTTCTAGTCTCTCATCATCTCTGAGCA interleukin 22 receptor, alpha 2             |
| Il23a   | <a href="#">NM_031252.1</a>    | p19, IL-23, IL-23p19                 | Extracellular Region,Extracellular S  | CAAGGACAACAGCCAGTCTGCTTCAAAGGATCCGCCA interleukin 23, alpha subunit p19           |
| Il23r   | <a href="#">NM_144548.1</a>    |                                      | Membrane,Integral To Membrane,        | AAGTATTTGGTATGGGTCAAAGTGTCAATCCCTAGGCC interleukin 23 receptor                    |
| Il25    | <a href="#">NM_080729.2</a>    | IL-17E, Il17e                        | Positive Regulation Of Transcription  | TTGGGAGAAACTCTGACTTTGCACTTTTGGGAAGCACT interleukin 25                             |
| Il27    | <a href="#">NM_145636.1</a>    | p28, IL-27, Il30, IL-27p28           | Extracellular Region,Extracellular S  | GCTATGCCAGCTTTGCTGAATCTCGATTGCCAGGAGT interleukin 27                              |
| Il27ra  | <a href="#">NM_016671.3</a>    | WSX-1, IL-27R, TCCR                  | Membrane,Integral To Membrane,        | TTTTGATTTAGTAAGAACTACCAGCAGGCTATGAC interleukin 27 receptor, alpha                |
| Il28a   | <a href="#">NM_001024673.2</a> | Ifnl2,IL-28A EG330496                |                                       | GCCACCAGCTCCAGTGAAGCAAAGGATTGCCACATT interferon lambda 2                          |
| Il2ra   | <a href="#">NM_008367.2</a>    | CD25, IL-2R alpha chain, Ly-43, Il2  | External Side Of Plasma Membrane      | AAGGAATTGGTCTATATGCGTGTCTAGGAACTCTGGG interleukin 2 receptor, alpha chain         |
| Il2rb   | <a href="#">NM_008368.3</a>    | CD122, Il-2Rbeta, IL-15Rbeta, IL-1   | External Side Of Plasma Membrane      | TTATTTTATGTGTCTTGGGCGATGCTGGTCTATGTAAGG interleukin 2 receptor, beta chain        |
| Il2rg   | <a href="#">NM_013563.3</a>    | gamma C receptor, common gam         | External Side Of Plasma Membrane      | ATCCAATGCTCACTGCCTCCCTTGGGGTAAAGTTTCGAT interleukin 2 receptor, gamma chain       |
| Il3     | <a href="#">NM_010556.4</a>    | IL-3, BPA, HCGF, MCGF, PSF, Csfm     | Extracellular Region,Extracellular S  | TGCAGCTCTATGTCAAAGGATATAGGGAAGTCCCA interleukin 3                                 |
| Il33    | <a href="#">NM_133775.1</a>    | NF-HEV, Il-33, Il1f11                | Extracellular Region,Nucleus,Extrac   | ATGACTTACGGCTGTGGTAAAGAACTGAAGGAGATTCA interleukin 33                             |
| Il4     | <a href="#">NM_021283.1</a>    | IL-4                                 | External Side Of Plasma Membrane      | TGCTTGAAGAAGAACTAGTGTCTCATGGAGCTGCAG interleukin 4                                |
| Il4ra   | <a href="#">NM_001008700.3</a> | CD124, IL-4 receptor alpha chain,    | Extracellular Region,Membrane,Int     | TGGAAATACCTGTACCATCGAAACACTACTGTACAAAG interleukin 4 receptor, alpha              |
| Il5     | <a href="#">NM_010558.1</a>    | IL-5                                 | Extracellular Region,Extracellular S  | CAATGAGACGATGAGGCTTCTGTCCCTACTCAAAAAAT interleukin 5                              |
| Il6     | <a href="#">NM_031168.1</a>    | IL-6                                 | External Side Of Plasma Membrane      | CTCTGCAAGAGACTTCCATCCAGTTGCCCTTCTGGGAC interleukin 6                              |
| Il6ra   | <a href="#">NM_010559.2</a>    | CD126, IL-6 receptor alpha chain,    | Cell Surface,Extracellular Region,M   | CACCTCACTGCCACCTTGGCCTTCTGCTTTACGTTTGCAG interleukin 6 receptor, alpha            |
| Il6st   | <a href="#">NM_010560.2</a>    | gp130, CD130, D13Erd699e             | External Side Of Plasma Membrane      | AGAAGCAACAAAGAACGCTTGTCCAGATGACGTGAA interleukin 6 signal transducer              |
| Il7     | <a href="#">NM_008371.2</a>    | IL-7, hlb368                         | Extracellular Region,Extracellular S  | AAACATTATTGGTGAACCACTGGGGGAGTGGAACTGTC interleukin 7                              |
| Il7r    | <a href="#">NM_008372.3</a>    | CD127, IL-7 receptor alpha chain,    | External Side Of Plasma Membrane      | GTTCCTGGACTGCCAGATTCATGAGGTGAAAGCGCTTG interleukin 7 receptor                     |
| Il9     | <a href="#">NM_008373.1</a>    | IL-9, P40                            | Extracellular Region,Extracellular S  | TCTGTTTTGCTCTTCACTTCTGTGCTGGCCAGAGATGCA interleukin 9                             |
| Ilf3    | <a href="#">NM_010561.2</a>    | NF90                                 | Ribonucleoprotein Complex,Cytopl      | GAGTTGAGGTGGACGGACAGAAAGTTTCAAGGTGCTGG interleukin enhancer binding factor 3      |
| Irak1   | <a href="#">NM_008363.2</a>    | mPLK, Plpk, Il1rak, IRAK-1           | Cytoplasm,Nucleus,Membrane Frac       | AGGTGAAACAGCTATCAAGTTTCTGCCCAAAATATCG interleukin-1 receptor-associated kinase 1  |
| Irak2   | <a href="#">NM_001113553.1</a> | IRAK-2                               | Cell Surface,Signal Transduction,Pr   | AGAAAGGCTTTGGGTTTCCCGAGACAGGCTTTTCTGI interleukin-1 receptor-associated kinase 2  |
| Irak3   | <a href="#">NM_028679.3</a>    | IRAK-M                               | Cytoplasm,Nucleus,Response To Vi      | AGCGTATTGATAGGAATGACAAAGCCATCAATACTGTG interleukin-1 receptor-associated kinase 3 |
| Irak4   | <a href="#">NM_029926.5</a>    | NY-REN-64, IRAK-4                    | Cytoplasm,Positive Regulation Of T    | TGATCCTCAAGAGGGTGAAGAAATAGCAGTAGCTA interleukin-1 receptor-associated kinase 4    |
| Ilr1    | <a href="#">NM_008390.1</a>    | Ilr-1                                | Nucleus,Positive Regulation Of Trar   | TGTTCCGAGCTGGCCATCACAGGCCGATACAAG interferon regulatory factor 1                  |



|          |                                |                                           |                                                                                                                                                                                 |
|----------|--------------------------------|-------------------------------------------|---------------------------------------------------------------------------------------------------------------------------------------------------------------------------------|
| Mbl2     | <a href="#">NM_010776.1</a>    | MBL-C, MBL, MBP-C                         | Extracellular Region, Extracellular S <sub>1</sub> CCCTGAGAACTGGGTGCTTCTCTCTGAGTAAAAAG <sup>1</sup> mannose-binding lectin (protein C) 2                                        |
| Mbp      | <a href="#">NM_010777.3</a>    | Hmbrpr, golli-mbp                         | Membrane, Cytoplasm, Nucleus, Cell TGCCAGGCATGGCTTCTCCCAAGGCACAGACACGGG myelin basic protein                                                                                    |
| Mif      | <a href="#">NM_010798.2</a>    | Glif                                      | Cell Surface, Extracellular Region, Cytoactin AACTATTACGACATGAACGCTGCCAAGCTGGGCTGGAAC macrophage migration inhibitory factor                                                    |
| Mme      | <a href="#">NM_008604.3</a>    | CD10, nepriylisin, NEP, neutral enz       | Brush Border, Axon, Membrane, Cyt <sup>r</sup> TGCTGACTGATTCAGAATATGGATGCCTCTGTTGAGCCA membrane metallo endopeptidase                                                           |
| Mr1      | <a href="#">NM_008209.4</a>    | MR1, H2Ls                                 | Membrane, Endoplasmic Reticulum TTACAAGTAGATCACAAGATGATCAGAGCCGCAAGCAACT major histocompatibility complex, class I-related                                                      |
| Ms4a1    | <a href="#">NM_007641.5</a>    | Ly-44, Cd20                               | External Side Of Plasma Membrane GCAACCTGCTCCAAAAGTGAACCTCAAAAGGACATCTTC <sup>r</sup> membrane-spanning 4-domains, subfamily A, member 1                                        |
| Msr1     | <a href="#">NM_001113326.1</a> | MSR-A, SR-A1, SR-AII, Scara1, Scvr        | Membrane, Cytoplasm, Cytoplasmic Ve GATTTGCTGACTGACGAATATGGAAATTCAGTGATGC macrophage scavenger receptor 1                                                                       |
| Muc1     | <a href="#">NM_013605.1</a>    | EMA, CD227, Muc-1                         | Cell Surface, Membrane, Cytoplasm, AACGGAGATTTTCTGGGGATCTCTAGCATCAAGTTCAGG <sup>r</sup> mucin 1, transmembrane                                                                  |
| Mx1      | <a href="#">NM_010846.1</a>    | myxovirus (influenza) resistance 1        | Cytoplasm, Nucleus, Response To Vi ACAAGGATTCACCTCTCTTTAGCCACCACCCATCAGA <sup>r</sup> myxovirus (influenza virus) resistance 1                                                  |
| Myd88    | <a href="#">NM_010851.2</a>    |                                           | Cytoplasm, Cytosol, Protein Comple: GCTGACGGCTCAGCTGTTTTCTCCAGCAGCGAGGTTTC myeloid differentiation primary response gene 88                                                     |
| Ncam1    | <a href="#">NM_001113204.1</a> | CD56, NCAM-1, NCAM-180, NCAM              | External Side Of Plasma Membrane ATGCTGTGATTTGCTGTGTGTGGTGCAGTCCCTGCCTCC neural cell adhesion molecule 1                                                                        |
| Ncf4     | <a href="#">NM_008677.2</a>    | p40phox                                   | Membrane, Cytoplasm, Cytosol, Pho: TCATGGATCGCATGGAAGCCCAAGAGCAGAGCCCTGTG <sup>1</sup> neutrophil cytosolic factor 4                                                            |
| Nfat1    | <a href="#">NM_016791.4</a>    | NFATc, NFAT2, NF-ATc                      | Cytoplasm, Nucleus, Nuclear Chrom: ATCCCGTTGCTTCCAGAAAATAACATGCGAGCCATCATCG nuclear factor of activated T cells, cytoplasmic, calcineurin dependent 1                           |
| Nfat2    | <a href="#">NM_001037177.1</a> | NFAT1, NFATp, NFAT1-D                     | Cytoplasm, Nucleus, Cytosol, Actin C GGTACTTAAAGCCGACGCTTCTTACCAAGTACACAGGA <sup>1</sup> nuclear factor of activated T cells, cytoplasmic, calcineurin dependent 2              |
| Nfat3    | <a href="#">NM_010901.2</a>    | NFAT4, NFATx, D8ErtD281e                  | Cytoplasm, Nucleus, Cytoplasm, Plasma GGGCTCACATTTGCTTGAAGTTCCCTCTATCATAACCC <sup>r</sup> nuclear factor of activated T cells, cytoplasmic, calcineurin dependent 3             |
| Nfil3    | <a href="#">NM_017373.3</a>    | E4BP4                                     | Nucleus, Transcription Dna Depend: CTTACCCGACAAGCTTCGGATTAAGCCAAGGCCATGCA <sup>r</sup> nuclear factor, interleukin 3, regulated                                                 |
| Nfkb1    | <a href="#">NM_008689.2</a>    | p50 subunit of NF kappaB, NF kappa        | Cytoplasm, Nucleus, Cytosol, Mitoch: GTCTTACACTAGCCATCATCCACTCCAGCTCAGCTGTG <sup>1</sup> nuclear factor of kappa light polypeptide gene enhancer in B cells 1, p105             |
| Nfkb2    | <a href="#">NM_019408.2</a>    | p52, NF kappaB2                           | Cytoplasm, Nucleus, Cytoplasm, Signal T CCTATCACAAGATGAAGATCGAGAGCCGTGAACGGTGT nuclear factor of kappa light polypeptide gene enhancer in B cells 2, p49/p100                   |
| Nfkbia   | <a href="#">NM_010907.2</a>    | I(Kappa)B(alpha), Nfkb1, I kappaB         | Cytoplasm, Nucleus, Cytoplasm, Protein CTGACGGCCACCACTACAATGCCACACGTGTCTGCAC <sup>r</sup> nuclear factor of kappa light polypeptide gene enhancer in B cells inhibitor, alpha   |
| Nfkbiz   | <a href="#">NM_030612.1</a>    | Mail                                      | Nucleus, Transcription Dna Depend: CCTTCTCTCCACTCAGAAATCAACCGTTCGAAGTCA <sup>r</sup> nuclear factor of kappa light polypeptide gene enhancer in B cells inhibitor, zeta         |
| Nod2     | <a href="#">NM_145857.2</a>    | Card15, Nlr2                              | Cell Surface, Cytoplasm, Vesicle, Cyt <sup>r</sup> CTGTGACGAAGGGGTATATCTCTCGAGAAGGACTCAA nucleotide-binding oligomerization domain containing 2                                 |
| Nos2     | <a href="#">NM_010927.3</a>    | iNOS, Nos-2, NOS-II, Nos2a                | Cytoplasm, Nucleus, Cytosol, Perinuc CCCCCCTCTCCACCTACCAAGTAGTATTGTA <sup>r</sup> nitric oxide synthase 2, inducible                                                            |
| Notch1   | <a href="#">NM_008714.2</a>    | lin-12, Tan1, Mis6, Motch A, N1           | Cell Surface, Golgi Apparatus, Cyto <sup>p</sup> TGAGATTGATGTTAATGATGCATCTCAACCCATGTGAG <sup>1</sup> Notch gene homolog 1 (Drosophila)                                          |
| Notch2   | <a href="#">NM_010928.1</a>    | Motch B, N2                               | Cell Surface, Membrane, Nucleus, Int GGGCTTCTATGCCATCAAGGGACCTATCTCACTCTCA <sup>r</sup> Notch gene homolog 2 (Drosophila)                                                       |
| Nox1     | <a href="#">NM_172203.1</a>    | GP91 phox homolog, Nox-1                  | Cell Junction, Membrane, Cytoplasm: CTCCAAACATGACAGTGTATGATGAGCATTTCAGTAT <sup>1</sup> NADPH oxidase 1                                                                          |
| Nox3     | <a href="#">NM_198958.2</a>    | het, nfmf250                              | Membrane, Cytoplasm, Integral To T GAGATGATTTCTACTACCCCGTAGCGTGTGCATGGCAAC <sup>1</sup> NADPH oxidase 3                                                                         |
| Nox4     | <a href="#">NM_015760.4</a>    |                                           | Cell Junction, Membrane, Endoplasm: GCTGTACTCAGTCAACAGATGGGATTCAGAAGATAAT <sup>1</sup> NADPH oxidase 4                                                                          |
| Npc1     | <a href="#">NM_008720.2</a>    | D18ErtD139e, D18ErtD723e, C853            | Golgi Apparatus, Endoplasmic Retic TGCTGAGGCCAATGTGGTAGCGGTTTGTGGGGCTT <sup>1</sup> Niemann Pick type C1                                                                        |
| Nt5e     | <a href="#">NM_011851.3</a>    | CD73, ecto-5'-nucleotidase, Nt5           | Cell Surface, Membrane, Cytoplasm, AAGCATGACTCTGGTGATCAAGATATCAGCGTGGTTCCT <sup>5</sup> nucleotidase, ecto                                                                      |
| Pax5     | <a href="#">NM_008782.2</a>    | Pax-5, EBB-1                              | Nucleus, Transcription Factor Comp TGAATCAGCTTGGGGGGTTTTTGTGAATGGACGGCCAC <sup>1</sup> paired box gene 5                                                                        |
| Pdcd1    | <a href="#">NM_008798.1</a>    | PD-1, Pdc1                                | External Side Of Plasma Membrane AGCAGGCTTCCGGTTTCTATTGTCAAGGCTGAGAG <sup>r</sup> programmed cell death 1                                                                       |
| Pdcd1lg2 | <a href="#">NM_021396.2</a>    | Btdc, PD-L2, B7-DC                        | Membrane, Integral To Membrane, ATTTGATGGCCACTGAGGGTGGCGTTCGGAAGTCT <sup>1</sup> programmed cell death 1 ligand 2                                                               |
| Pdcd2    | <a href="#">NM_008799.2</a>    | RP-8                                      | Cytoplasm, Nucleus, Apoptosis Go, Z TATTCCTCAAGAAAAGATATTCAGATTGCCGTGGT <sup>1</sup> programmed cell death 2                                                                    |
| Pdgfrb   | <a href="#">NM_011057.3</a>    | Sis, PDGF-B                               | Cell Surface, Extracellular Region, M AGCAAGGTTGTAATGGGATGATATATGCACATGATGCAC <sup>1</sup> platelet derived growth factor, B polypeptide                                        |
| Pdgfrb   | <a href="#">NM_008809.1</a>    | CD140b, Pdgfr                             | Intrinsic To Plasma Membrane, Mer CTCAAGGACAACCGTACCTTGGGTGACTCCGGCTGGT <sup>1</sup> platelet derived growth factor receptor, beta polypeptide                                  |
| Pecam1   | <a href="#">NM_008816.2</a>    | PECAM-1, Cd31                             | External Side Of Plasma Membrane ACACCTGCAAAGTGAATCAACCGTATCTCCAAAGCCA <sup>r</sup> platelet/endothelial cell adhesion molecule 1                                               |
| Phlpp1   | <a href="#">NM_133821.3</a>    | AI836256, Phlpp, Plekhe1, SCOP, mKIAA0606 | TGCAGCAGCATGCACACCGTATTGCTCACTCAATGTGA <sup>1</sup> PH domain and leucine rich repeat protein phosphatase 1                                                                     |
| Phlpp2   | <a href="#">NM_001122594.2</a> | Phlpp1                                    | Membrane, Cytoplasm, Nucleus, Me TGCTGGGTGCTATCACAGTGGCTTTCACGAGTGTCTGTT <sup>1</sup> PH domain and leucine rich repeat protein phosphatase 2                                   |
| Pigr     | <a href="#">NM_011082.3</a>    |                                           | Extracellular Region, Membrane, Int GACACCCAGCTTACACAAAGGACATAGGCAGAAATGTG <sup>1</sup> polymeric immunoglobulin receptor                                                       |
| Pla2g2a  | <a href="#">NM_001082531.1</a> | Enhancing factor, EF, modifier of m       | Membrane, Endoplasmic Reticulum ACGGTGCTGTGTTACTCATGACTTGTGTTCAAGAGCCT <sup>1</sup> phospholipase A2, group IIA (platelets, synovial fluid)                                     |
| Pla2g2e  | <a href="#">NM_012044.2</a>    | mGIESPLA2s                                | Extracellular Region, Lipid Catabolic CCTGGTCCAGTTTGGAGTGATGATGAGAGATGACGGG <sup>1</sup> phospholipase A2, group IIE                                                            |
| Plau     | <a href="#">NM_008873.2</a>    | uPA, u-PA, urokinase-type plasmin         | Cell Surface, Extracellular Region, Ex CAAGTCTAGTATTTCCCTAACTCCAGACTGTGATGCGGC <sup>1</sup> plasminogen activator, urokinase                                                    |
| Plaur    | <a href="#">NM_011113.3</a>    | uPAR, Cd87, u-PAR, urokinase-type         | Cell Surface, Extracellular Region, M TTCTTTGGACCTCAGTTTTTCCATGAACCAAGAAGAATT <sup>1</sup> plasminogen activator, urokinase receptor                                            |
| Pml      | <a href="#">NM_008884.2</a>    | Trim19                                    | Nucleoplasm, Membrane, Cytoplasm CACAGGTGGCTTATGGCTCTTCTGGATGTTCCATTCA <sup>r</sup> promyelocytic leukemia                                                                      |
| Pou2f2   | <a href="#">NM_001163554.1</a> | Oct2a, Oct2b, Oct-2, Otf-2, Otf2          | Cytoplasm, Nucleus, Positive Regula AAAGAGAAAAGACCCGAACCACTTACACCAAATCACTCA <sup>1</sup> POU domain, class 2, transcription factor 2                                            |
| Pparg    | <a href="#">NM_011146.1</a>    | Nr1c3, PPAR-gamma, Ppar-gamma             | Cytoplasm, Nucleus, Cytosol, Positive ACCAAGTACTCTGCTCAAGTATGGTCCATGAGATCA <sup>1</sup> peroxisome proliferator activated receptor gamma                                        |
| Ppbb     | <a href="#">NM_023785.2</a>    | Scyb7, CTAP3, TGB, NAP-2, b-TG1           | Extracellular Region TATCGAATGCGCTGCAGATGTACGAATACCATCTCTGG <sup>r</sup> pro-platelet basic protein                                                                             |
| Prdm1    | <a href="#">NM_007548.3</a>    | PRDI-BF1, Blimp1, Blimp-1                 | Cytoplasm, Nucleus, Transcription D CCAATGGCTGAGCACCATGAACAACATCAATGGTATCA <sup>r</sup> PR domain containing 1, with ZNF domain                                                 |
| Prf1     | <a href="#">NM_011073.2</a>    | perforin, Prf-1, Pfp, Pfn                 | Extracellular Region, Membrane, Int ACAGTACTGATGCCTACCTAAAGGCTCTTCTTGGTGGCC <sup>1</sup> perforin 1 (pore forming protein)                                                      |
| Prim1    | <a href="#">NM_008921.2</a>    |                                           | Transcription Dna Dependent, Dna I GAGGTTACAAGAAGACCACTAGCAGCTGATGTGA <sup>1</sup> DNA primase, p49 subunit                                                                     |
| Prkcd    | <a href="#">NM_011103.2</a>    | PKC[d], PKCdelta, Pkcd, D14ErtD4          | Intercellular Junction, Membrane, C AGGACCACCTGTTCTCGTGTGAGGATTTCTCAATGGGG <sup>r</sup> protein kinase C, delta                                                                 |
| Psmb10   | <a href="#">NM_013640.3</a>    | Mecl1, Mecl-1                             | Cytoplasm, Proteasome Complex, Ni AACCCACAGGAGGCTCTCTTTGAGAACTGCCAGAGGA <sup>1</sup> proteasome (prosome, macropain) subunit, beta type 10                                      |
| Psmb11   | <a href="#">NM_175204.4</a>    | beta5t                                    | Cytoplasm, Proteasome Complex, Ni GGTGAGAAGGAGATCAAAATCCCTGGAGTACAGATC <sup>1</sup> proteasome (prosome, macropain) subunit, beta type, 11                                      |
| Psmb5    | <a href="#">NM_011186.1</a>    |                                           | TGCACTTCTGGGACGGTGTGGCTCGGACAGTGTGCA <sup>1</sup> proteasome (prosome, macropain) subunit, beta type 5                                                                          |
| Psmb7    | <a href="#">NM_011187.1</a>    | MC14                                      | Cytoplasm, Proteasome Complex, Ni ACGAGGCAACTGAAGGATGTTGTTGTGACAAAAA <sup>r</sup> proteasome (prosome, macropain) subunit, beta type 7                                          |
| Psmb9    | <a href="#">NM_013585.2</a>    | Lmp-2, Lmp2                               | Cytoplasm, Proteasome Complex, Ni TTCACCACAGATGCCATCACTCTGGCCATGAACCGAGAT <sup>1</sup> proteasome (prosome, macropain) subunit, beta type 9 (large multifunctional peptidase 2) |
| Psmc2    | <a href="#">NM_011188.3</a>    |                                           | Cytoplasm, Proteasome Complex, Ni AACACTCAGAAGTGAACAGCCATACAGGTGGCAAGATG <sup>1</sup> proteasome (prosome, macropain) 26S subunit, ATPase 2                                     |
| Psmf7    | <a href="#">NM_010817.2</a>    | Mov-34, Mov34                             | Proteasome Complex ATTGCTAAATGAAATTCATGGATCCATCAATGCCGCC <sup>1</sup> proteasome (prosome, macropain) 26S subunit, non-ATPase, 7                                                |
| Ptafr    | <a href="#">NM_01081211.1</a>  | PAF receptor, PAFR                        | Membrane, Nucleus, Integral To Me TCCTTGGTCCATCTATAGTACAAGTCTTGTGACCTT <sup>r</sup> platelet-activating factor receptor                                                         |
| Ptger4   | <a href="#">NM_008965.1</a>    | Ptgerep4, EP4                             | Membrane, Integral To Membrane, GGTGGCCATCGTAGTATTGTGCAAGTCGCGCAAGGAGCA <sup>1</sup> prostaglandin E receptor 4 (subtype EP4)                                                   |
| Ptgs2    | <a href="#">NM_011198.3</a>    | Cox-2, cyclooxygenase 2, Pghs2, C         | Membrane, Cytoplasm, Endoplasmic CCTACGTTTTTCAAGACAGATCAATAGCAGGACCTGG <sup>r</sup> prostaglandin-endoperoxide synthase 2                                                       |
| Ptk2     | <a href="#">NM_007982.2</a>    | Fadk, FAK, FRNK, fak                      | Cell Junction, Membrane, Cytoplasm: rTGTACAGATTTGACAAGAGTCTTCAAGTGTGCCCTTG <sup>1</sup> PK2 protein tyrosine kinase 2                                                           |
| Ptpn2    | <a href="#">NM_001127177.1</a> | Ptpt, TC-PTP                              | Cytoplasm, Endoplasmic Reticulum, GCTGGCAGCCGTTACTGTGAAATTCGAAATGAATCCC <sup>r</sup> protein tyrosine phosphatase, non-receptor type 2                                          |
| Ptpn22   | <a href="#">NM_008979.1</a>    | 70zpep, Ptpn8                             | Cytoplasm, Nucleus, Perinuclear Reg GAATGCCAGGAAAGAGTTGGTTTTGCACCTGCTAAATC <sup>1</sup> protein tyrosine phosphatase, non-receptor type 22 (lymphoid)                           |

|          |                                |                                         |                                      |                                                                                                           |
|----------|--------------------------------|-----------------------------------------|--------------------------------------|-----------------------------------------------------------------------------------------------------------|
| Ptpn6    | <a href="#">NM_013545.2</a>    | SHP-1, hcp, Ptp1C, Hcph                 | Cytoplasm,Nucleus,Positive Regula    | GACCAGGCCCCAGTACAAGTTTATTTACGTGGCCATTGC protein tyrosine phosphatase, non-receptor type 6                 |
| Ptprc    | <a href="#">NM_011210.3</a>    | T200, B220, CD45, Lyt-4, Ly-5           | External Side Of Plasma Membrane     | AGTGGATGTCTATGTTATGTTGTCAAGCTAAGCGGACAI protein tyrosine phosphatase, receptor type, C                    |
| Rae1     | <a href="#">NM_175112.5</a>    | 41, MNRP, MNRP41, D2ErtD342e            | Cytoplasm,Nucleus                    | TTGTTGAGCATCAGCAGCATCTCCGGGCACTTCCGGCT RAE1 RNA export 1 homolog (S. pombe)                               |
| Rag1     | <a href="#">NM_009019.2</a>    | Rag-1                                   | Nucleus,B Cell Differentiation,Dna I | GAAGCACGGGATGGGCGCAGTTCAGAAAAGGCGC recombination activating gene 1                                        |
| Rag2     | <a href="#">NM_009020.3</a>    | Rag-2                                   | Nucleus,T Cell Differentiation,B Cel | GAAGATCCTGGGACTCCACTCCCTTGAAGACTCAGAGI recombination activating gene 2                                    |
| Rela     | <a href="#">NM_009045.4</a>    | p65 NF kappaB, p65                      | Cytoplasm,Nucleus,Cytosol,Transcr    | GAGGCTGACTCTGCCAGACCGCAGTATCCATAGCTTCC v-rel reticuloendotheliosis viral oncogene homolog A (avian)       |
| Relb     | <a href="#">NM_009046.2</a>    | shep                                    | Cytoplasm,Nucleus,Cytosol,Cytoske    | TTCTCTTTGAGCCATTTTACAGAATGCTGAGTCCGAAGA avian reticuloendotheliosis viral (v-rel) oncogene related B      |
| Rorc     | <a href="#">NM_011281.2</a>    | thymus orphan receptor, Thor, RC        | Nucleus,Transcription Dna Depend     | CTTTCCTTTCTGCCTCTATGAAGGTTGATCCCTAGG RAR-related orphan receptor gamma                                    |
| Runx1    | <a href="#">NM_001111021.1</a> | runt domain, alpha subunit 2, Peb       | Basement Membrane,Nucleus,Posi       | ACAGTGGAGGACTTGGTCAAAATCCAGTTGTTCTACAAC runt related transcription factor 1                               |
| Runx3    | <a href="#">NM_019732.2</a>    | AML2, Cbfa3                             | Cytoplasm,Nucleus,Nuclear Chrom:     | CTCTGCACATAGTCTGTTGAAAATTTGGCTAGACATT runt related transcription factor 3                                 |
| S100a8   | <a href="#">NM_013650.2</a>    | MRP8, Caga, p8, B8AG, CP-10, CFA        | Extracellular Region,Membrane,CyI    | GGACATCAATAGTACAAATGCAATTAACCTCGAGGAGT S100 calcium binding protein A8 (calgranulin A)                    |
| S100a9   | <a href="#">NM_009114.2</a>    | MRP14, Cagb, p14, L1Ag, GAGB, 6         | Extracellular Region,Membrane,CyI    | AAGGACACCTGCACCCCTGAGCAAGAAGGAATTCAGAC S100 calcium binding protein A9 (calgranulin B)                    |
| Sele     | <a href="#">NM_011345.2</a>    | E-selectin, CD62E, Elam                 | Membrane,Perinuclear Region Of       | CTCAGTGGCTGCCAAGTATTCTTGAACATTGTGTTCTGTG selectin, endothelial cell                                       |
| Sell     | <a href="#">NM_001164059.1</a> | L-selectin, LECAM-1, CD62L, Ly-m:       | External Side Of Plasma Membrane     | CTCCAGTGTCTTCAACTGTTCTGAGGGAAGAGAGCT. selectin, lymphocyte                                                |
| Selplg   | <a href="#">NM_009151.3</a>    | Psgl1, Psgl-1, CD162                    | Membrane,Integral To Membrane,       | CTCTGGACTCCATCTCACAGTAAATATGAACACAACTA selectin, platelet (p-selectin) ligand                             |
| Serping1 | <a href="#">NM_009776.3</a>    | C1nh, C1 inhibitor, C1INH               | Extracellular Region,Extracellular S | TCTGCCATCTCTTTGGCCGAAGCTTACCCATCTTGGAGG serine (or cysteine) peptidase inhibitor, clade G, member 1       |
| Sh2d1a   | <a href="#">NM_011364.3</a>    | Duncan disease homolog, SAP             | Cytoplasm,Positive Regulation Of S   | TTGATATCAAGGTACATCTACACATACGAGTGCACAGA SH2 domain protein 1A                                              |
| Sigirr   | <a href="#">NM_023059.3</a>    | Sigirr, Tir8                            | Intrinsic To Membrane,Membrane,      | CTGGCTAGCGCCCAACTCTCACAGATGTGTCCAGTGT single immunoglobulin and toll-interleukin 1 receptor (TIR) domain  |
| Ski      | <a href="#">NM_011385.2</a>    |                                         | Nuclear Part,Cytoplasm,Nucleus,Nt    | TGATTCGACAGCTTCTACTCTCAAGAGCTTGGAGAC ski sarcoma viral oncogene homolog (avian)                           |
| Slamf1   | <a href="#">NM_013730.4</a>    | CD150, IPO-3, ESTM51, Slam, CDv         | External Side Of Plasma Membrane     | ATGGATCCAAAGGATCCCTTCTCGGGAATACTTCTGT signaling lymphocytic activation molecule family member 1           |
| Slamf7   | <a href="#">NM_144539.5</a>    | novel Ly9, CS1, 19A24, 19A              | Membrane,Integral To Membrane,       | TCCGTCGACGAGATTACAGTACATCAGTCCAGGCTCC SLAM family member 7                                                |
| Smad3    | <a href="#">NM_016769.3</a>    | Smad 3, Madh3                           | Cytoplasm,Nucleus,Receptor Comp      | GTGTATGCCACCTGACTCCTGTTTAAATGACAGAGGTCT MAD homolog 3 (Drosophila)                                        |
| Smad5    | <a href="#">NM_008541.2</a>    | MusMLP, Smad 5, Madh5                   | Cytoplasm,Nucleus,Transcription F:   | ATAGCTTTGCTCTTACCAGACTTGTATCAACAAGACTCG MAD homolog 5 (Drosophila)                                        |
| Socs1    | <a href="#">NM_009896.2</a>    | SSI-1, JAB, JAK-binding protein, S1     | Nucleus,Cytoplasmic Vesicle,Jak St:  | CAGCTGTGCTGGGCGCAGGACTGAATCCACTAC suppressor of cytokine signaling 1                                      |
| Socs3    | <a href="#">NM_007707.2</a>    | SOCS-3, EF-10, E2a-Pbx1 target ge       | Cytoplasm,Positive Regulation Of C   | CCGCGACGCTGGACAGGCCACTTCTTCCAGTTGAGI suppressor of cytokine signaling 3                                   |
| Spn      | <a href="#">NM_001037810.1</a> | 3E8 antigen, leukosialin, Cd43, Ly-     | External Side Of Plasma Membrane     | GCAACAGTCTGTGGAGAGTCCAGTGTGGCCCGTGGC sialophorin                                                          |
| Src      | <a href="#">NM_001025395.2</a> | pp60c-src                               | Membrane,Cytoplasm,Nucleus,Cyt:      | TGCCAAGGGCTAAATGTGAAACACTACAAGATCCGCAA Rous sarcoma oncogene                                              |
| Stat1    | <a href="#">NM_009283.3</a>    |                                         | Axon,Cytoplasm,Nucleus,Dendrite,     | ACGCTGGGAACAGAACTAATGAGGGCCTCTCATTTGCA signal transducer and activator of transcription 1                 |
| Stat2    | <a href="#">NM_019963.1</a>    |                                         | Cytoplasm,Nucleus,Plasma Membr:      | TGAGTAACTTCTGAAGGGGCTTACTTGTCTTGGG signal transducer and activator of transcription 2                     |
| Stat3    | <a href="#">NM_213659.2</a>    | Aprf                                    | Cytoplasm,Nucleus,Plasma Membr:      | GGGCTCACTTTCACTTGGGTTGAAAAGGACATCAGTGGC signal transducer and activator of transcription 3                |
| Stat4    | <a href="#">NM_011487.4</a>    |                                         | Cytoplasm,Nucleus,Positive Regula    | TAGACACAGCTTACCTGCTGATGATTTCTAATGT signal transducer and activator of transcription 4                     |
| Stat5a   | <a href="#">NM_011488.2</a>    | STAT5                                   | Cytoplasm,Nucleus,Positive Regula    | CATGCTACTGAAAAGAAATCAAGCGCCGACAGCGGTGC signal transducer and activator of transcription 5A                |
| Stat5b   | <a href="#">NM_011489.3</a>    |                                         | Cytoplasm,Nucleus,Cytosol,Positive   | TGAGGTTGACTCTGGACATGGGAGAGGTTTTTAACTGGA signal transducer and activator of transcription 5B               |
| Stat6    | <a href="#">NM_009284.2</a>    |                                         | Cytoplasm,Nucleus,Nuclear Chrom:     | CATTGTATAAGACAGCAACCCAGTATCATTTGGGAGTA signal transducer and activator of transcription 6                 |
| Syk      | <a href="#">NM_011518.2</a>    | Sykb                                    |                                      | TGATAGGGAGGCATCTAGAGCATGTTAGGAAGI spleen tyrosine kinase                                                  |
| Tagap    | <a href="#">NM_145968.2</a>    |                                         | Signal Transduction,Regulation Of    | (TCATGAGAAGCTCTCTCTTACCTCGACTTCTGGGT/ T cell activation Rho GTPase activating protein                     |
| Tal1     | <a href="#">NM_011527.2</a>    | SCL/tal-1, Scl, bHLHa17                 | Nucleus,Nuclear Chromatin,Transcr    | CCGATCTATCTAAAGCTAGGCTGCTATAATGAAGTTC T cell acute lymphocytic leukemia 1                                 |
| Tap1     | <a href="#">NM_001161730.1</a> | PSF-1, RING4, MTP1, Ham-1, Tap-         | Integral To Endoplasmic Reticulum    | GGCCATCTCTTCTACGGCCGCGCATCAGCTGGAT transporter 1, ATP-binding cassette, sub-family B (MDR/TAP)            |
| Tapbp    | <a href="#">NM_009318.2</a>    | tapasin, TPN, D17Wsu91e                 | Golgi Membrane,Membrane,Endo:        | AGGGAGTTTCAAGTCACTGGGGTTACTTGGCGGGCTI TAP binding protein                                                 |
| Tbk1     | <a href="#">NM_019786.4</a>    |                                         | Cytoplasm,Response To Virus,Posit    | ATACACTGTTCTAGAGGAGCCGCAATGCGTATGGACT TANK-binding kinase 1                                               |
| Tbx21    | <a href="#">NM_019507.1</a>    | TBT1, Tblym, T-bet                      | Nucleus,Cell Soma,Positive Regulat   | CACTAAGCAAGGACGGCAATGTTCCTTCTCTGCTTCC T-box 21                                                            |
| Tcf4     | <a href="#">NM_013685.1</a>    | SEF-2, ME2, MITF-2A, MITF-2B, ITI       | Nucleus,Transcription Factor Comp    | AATACCAGATATTGAATAGGGGAAGCCCGCTGCCCTC transcription factor 4                                              |
| Tcf7     | <a href="#">NM_009331.3</a>    | TCF-1, Tcf1, T-cell factor 1, T cell f: | Nucleus,Transcription Factor Comp    | TTTTCCCAAGAGCTCACCAGCATTAACTATGTAATA transcription factor 7, T cell specific                              |
| Tfrc     | <a href="#">NM_011638.3</a>    | CD71, Mtvr-1, Mtvr1, Trfr, p90, Tf      | Cell Surface,Extracellular Region,M  | CTGAACCAAGTTCAAAACAGATACAGGGATATGGGTCTA transferrin receptor                                              |
| Tgfb1    | <a href="#">NM_011577.1</a>    | TGF-beta 1, Tgfb, Tgfb-1, TGFbeta       | Proteinaceous Extracellular Matrix,  | GGAGTGTACGGCAGTGGCTGAACCAAGGAGACGGAAT transforming growth factor, beta 1                                  |
| Tgfb2    | <a href="#">NM_009367.1</a>    | Tgf-beta2, Tgfb-2                       | Cell Surface,Axon,Extracellular Regi | CCCAAGCCAGAGTGGCCAGCAGCGGATGAAGTGTAT transforming growth factor, beta 2                                   |
| Tgfb3    | <a href="#">NM_009368.2</a>    | Tgfb-3                                  | Cell Surface,Extracellular Region,Cy | TGATGTAATGATTTCTGGCCAGCAACTAGCTATCTCAG transforming growth factor, beta 3                                 |
| TgfbI    | <a href="#">NM_009369.4</a>    | biG-h3, 68kDa, Beta-ig                  | Proteinaceous Extracellular Matrix,  | TCTGTGTTCAAAGATGGTGTCCCTGCATCGAGCCAG transforming growth factor, beta induced                             |
| TgfbR1   | <a href="#">NM_009370.2</a>    | TbetaR-I, TbetaRI, ALK5, Alk-5          | Cell Junction,Tight Junction,Membr   | TCAGAAGTAGTGCCAGCTGTCTCTAGTAGGACAGTA transforming growth factor, beta receptor I                          |
| TgfbR2   | <a href="#">NM_009371.2</a>    | TbetaRII, TbetaR-II, TBR-II             | External Side Of Plasma Membrane     | TGTGCAAGTTTGGCAGTGTGAGACTGTCCACTTGCACA transforming growth factor, beta receptor II                       |
| Thy1     | <a href="#">NM_009382.3</a>    | CD90, Thy-1, Thy 1.2, Thy1.1, Thy:      | External Side Of Plasma Membrane     | ACTTTTGTAGCTTCAAGTCTGGGCGGAATCCCATGAC thymus cell antigen 1, theta                                        |
| Tigit    | <a href="#">NM_001146325.1</a> | ENSMUSG00000071552, Vstm3               | Cell Surface                         | GCAGAAGTAGACTGTGACCCACAGGAATACTTAAIT T cell immunoreceptor with Ig and ITIM domains                       |
| Tirap    | <a href="#">NM_001177847.1</a> | Mal, Myd88-adaptor-like, wyatt,         | Cytoplasm,Endocytic Vesicle,Signal   | AGGAGTGTCAAACCACTCAACTACCTGGAATCGGCTG toll-interleukin 1 receptor (TIR) domain-containing adaptor protein |
| Tlr1     | <a href="#">NM_030682.1</a>    |                                         | Intrinsic To Membrane,Membrane,      | TCACTACAGTCCGTTTGAAGCTGTAACATCAAGCT toll-like receptor 1                                                  |
| Tlr2     | <a href="#">NM_011905.2</a>    | Ly105                                   | External Side Of Plasma Membrane     | GCAAGCGGCTACTGGCAGGAGTGTGCCCAATCATACT toll-like receptor 2                                                |
| Tlr3     | <a href="#">NM_126166.2</a>    |                                         | Cell Surface,Membrane,Cytoplasm,     | TTTTCTGGGCTGAAGTGGACAATCTCACCCAGCTCGAT toll-like receptor 3                                               |
| Tlr4     | <a href="#">NM_021297.2</a>    | Lps, Rasl2-8, lipopolysaccharide re     | External Side Of Plasma Membrane     | AACGGCAACTTGGACCTGAGGAGAACAAAATCTGGGG toll-like receptor 4                                                |
| Tlr5     | <a href="#">NM_016928.2</a>    |                                         | Membrane,Integral To Membrane,       | CTGGGACCCAGATGCTAATGACCTTGGTCCAGGG toll-like receptor 5                                                   |
| Tlr8     | <a href="#">NM_133212.2</a>    |                                         | Membrane,Integral To Membrane,       | TCCATAAAGCGAACTATCCAGAAGCTATCCTTGTGACGA toll-like receptor 8                                              |
| Tlr9     | <a href="#">NM_031178.2</a>    |                                         | Membrane,Cytoplasm,Endoplasmic       | GGCCCAATTTTCAGTTTGTGACCACTGTCCATGCTAC toll-like receptor 9                                                |
| Tmem173  | <a href="#">NM_028261.1</a>    | MPYS, ERIS, Sting                       | Mitochondrial Outer Membrane,M       | AAATCTGTGGGGCCCTGCTCACTTTTGGTCTGTATGGA transmembrane protein 173                                          |
| Tnf      | <a href="#">NM_013693.1</a>    | tumor necrosis factor-alpha, TNF-       | External Side Of Plasma Membrane     | TTCTGAGTCTGCAAAGGAGAGTGTGAGTGTGCTC tumor necrosis factor                                                  |
| Tnfr1    | <a href="#">NM_009397.2</a>    | zinc finger protein A20, A20, TnfrI     | Cytoplasm,Nucleus,Centrosome,Pr      | GGCTGAACAATCTTCTCAGGCTTGTATTGAGCAAT tumor necrosis factor, alpha-induced protein 3                        |
| Tnfr2    | <a href="#">NM_009398.2</a>    | Tsg6, Tnfr2, TSG-6                      |                                      | AGGCTGCTGCTACTGTAGAAATCTATGACAGTTA1 tumor necrosis factor alpha induced protein 6                         |



|                                 |                                |                                     |                                     |                                                                                                                            |
|---------------------------------|--------------------------------|-------------------------------------|-------------------------------------|----------------------------------------------------------------------------------------------------------------------------|
| Tnfrsf11a                       | <a href="#">NM_009399.3</a>    | Rank, TRANCE-R                      | External Side Of Plasma Membrane    | ATTGGTGTCTCTCTATTGTGGGGTCCATCCCATAGGCAG tumor necrosis factor receptor superfamily, member 11a                             |
| Tnfrsf13b                       | <a href="#">NM_021349.1</a>    | Taci                                | External Side Of Plasma Membrane    | GTCCAGGATTGAGGCTAAGTAGCCAGCAGCTGACTCTCT.tumor necrosis factor receptor superfamily, member 13b                             |
| Tnfrsf13c                       | <a href="#">NM_028075.2</a>    | BAFF-R, Bcmd-1, Baffr, Lvis22, Bcr  | External Side Of Plasma Membrane    | AATGCACCTGCGGGTGGCTCATTACTAGCATAACTTTTGG tumor necrosis factor receptor superfamily, member 13c                            |
| Tnfrsf14                        | <a href="#">NM_178931.2</a>    | Hvem, Atar, HveA                    | External Side Of Plasma Membrane    | ACAGACACCAGCTGCTCCTCCAGGTCGTCTACTACGTTG tumor necrosis factor receptor superfamily, member 14 (herpesvirus entry mediator) |
| Tnfrsf17                        | <a href="#">NM_011608.1</a>    | BCM, Tnfrsf13a, Tnfrsf13            | Membrane,Integral To Membrane,      | CCTCATGGCCCAACAGTGTTCACAGTGAATATTTTGAC tumor necrosis factor receptor superfamily, member 17                               |
| Tnfrsf1b                        | <a href="#">NM_011610.3</a>    | CD120b, p75, TNF-R2, p75 TNFR,      | 1Axon,Membrane,Nucleus,Perinucle    | GTGTGTGTCCATGTTTGCATGTATGTGTGTGCCAGTGTGT tumor necrosis factor receptor superfamily, member 1b                             |
| Tnfrsf4                         | <a href="#">NM_011659.2</a>    | CD134, ACT35, Ox40, Txgp1           | External Side Of Plasma Membrane    | ATGGTGAGCCAGCTGCTCCTCCAGGTCGTCTACTACGTTG tumor necrosis factor receptor superfamily, member 4                              |
| Tnfrsf8                         | <a href="#">NM_009401.2</a>    | CD30                                | Membrane,Integral To Membrane,      | GAGCCCCGGGTATCCAGGAAACACCAATAACAGGATT tumor necrosis factor receptor superfamily, member 8                                 |
| Tnfrsf9                         | <a href="#">NM_001077508.1</a> | 4-1BB, CDw137, Cd137, Ly63, ILA     | External Side Of Plasma Membrane    | TCTTCAGAGCAGTTCAGGGCCCTGCTTCTCTCTCTCT tumor necrosis factor receptor superfamily, member 9                                 |
| Tnfrsf10                        | <a href="#">NM_009425.2</a>    | APO-2L, Trail                       | Membrane,Integral To Membrane,      | GTCCACCATGCTGCTTGTCCAGATTGCCAGTGTCAACC tumor necrosis factor (ligand) superfamily, member 10                               |
| Tnfrsf11                        | <a href="#">NM_011613.3</a>    | RANKL, ODF, OPGL, Ly109l, Trance    | Extracellular Region,Membrane,Cyl   | CCAGCCGAGGCAAGCCTGAGGCCAGCCATTGACACCT tumor necrosis factor (ligand) superfamily, member 11                                |
| Tnfrsf12                        | <a href="#">NM_011614.3</a>    | Tweak, DR3L, APO3L                  | Extracellular Region,Membrane,Pei   | TCAAAGCAGCCAGAGCTTGTTCACATGTTTTCCATCCA tumor necrosis factor (ligand) superfamily, member 12                               |
| Tnfrsf13b                       | <a href="#">NM_033622.1</a>    | BAFF, zTNF4, TALL-1, BlyS, D8Ert    | Extracellular Region,Membrane,Int   | TCTGCAAAAGACCTGCCACCCTGCTCTTTTTGCT(tumor necrosis factor (ligand) superfamily, member 13b                                  |
| Tnfrsf14                        | <a href="#">NM_019418.2</a>    | HVEM-L, LIGHT                       | Extracellular Region,Membrane,Int   | CAGGAAGAAAGAAATCAAGCTGGGTATTTATGCTTCTGA tumor necrosis factor (ligand) superfamily, member 14                              |
| Tnfrsf15                        | <a href="#">NM_177371.3</a>    | TL1, TL1A, VEGI                     | Membrane,Integral To Membrane,      | AAGACTCACAAAGCCGAGTTGACAGTACTTTTCTGAAGCA tumor necrosis factor (ligand) superfamily, member 15                             |
| Tnfrsf18                        | <a href="#">NM_183391.3</a>    | GITR ligand, Gitrl                  | Cell Surface,Membrane,Integral To   | GCACAGTGAGAACATGGGTAGTAGAACCTAAGACTCT tumor necrosis factor (ligand) superfamily, member 18                                |
| Tnfrsf8                         | <a href="#">NM_009403.2</a>    | Cd30L, CD153, CD30LG                | Membrane,Integral To Membrane,      | ATCCAGGATGCAAGGGAAATCTCTTGTGAACAGAGCT tumor necrosis factor (ligand) superfamily, member 8                                 |
| Tollip                          | <a href="#">NM_023764.3</a>    | Toll interacting protein            | Cytoplasm,Perinuclear Region Of C   | CTCAGACTCACTGGTACAGGCAAATGCAAGAAT toll interacting protein                                                                 |
| Traf1                           | <a href="#">NM_009421.3</a>    |                                     | Cytoplasm,Signal Transduction,Acti  | ACCTGTCCCTCTTCTCATGTGATCATGAGAGAGAATACG TNF receptor-associated factor 1                                                   |
| Traf2                           | <a href="#">NM_009422.2</a>    |                                     | Cytoplasm,Cell Cortex,Lipid Raft,Pr | CAGAACTGTGCTGCCTGTGTCTATGAAGCCCTGTATGAA TNF receptor-associated factor 2                                                   |
| Traf3                           | <a href="#">NM_001048206.1</a> | CRAF1, CD40bp, CAP-1, LAP1          | Cytoplasm,Endosome,Signal Transc    | GGTTGGGGTCCAGTGCAGACAGCTGCAGACTTCTAAAG TNF receptor-associated factor 3                                                    |
| Traf4                           | <a href="#">NM_009423.4</a>    | CART1, msp2                         | Cell Junction,Tight Junction,Membr  | CAGTTACCACCTAAGCTGGCATCTCCAGTCCATCTCACI TNF receptor associated factor 4                                                   |
| Traf5                           | <a href="#">NM_011633.1</a>    |                                     | Cytoplasm,Centrosome,Positive Re    | AAGACACACTGTTCTTGAAAGTGCCCGTGATTA TNF receptor-associated factor 5                                                         |
| Traf6                           | <a href="#">NM_009424.2</a>    |                                     | Cytoplasm,Nucleus,Cytosol,Perinuc   | GTGCTGTCCATGGCATATGAAGAGAAAGAGATCCATG TNF receptor-associated factor 6                                                     |
| Trem1                           | <a href="#">NM_021406.3</a>    |                                     | Membrane,Integral To Membrane,      | GACCTAGTGAGGCCATGCTACAAGTTCAAATGACTGACI triggering receptor expressed on myeloid cells 1                                   |
| Trem2                           | <a href="#">NM_031254.2</a>    | Trem2a, Trem2b, Trem2c              | Extracellular Region,Membrane,Int   | GAATCAAGAGACCTCTCCACCACCTCCATCTTCTCC triggering receptor expressed on myeloid cells 2                                      |
| Trp53                           | <a href="#">NM_011640.1</a>    | p53, p44                            | Nucleoplasm,Chromatin,Cytoplasm     | CCCTCTGAGTAGTGGTCTCCGGCCAAAGTGGGGAAT transformation related protein 53                                                     |
| Tslp                            | <a href="#">NM_021367.1</a>    |                                     | Extracellular Region,Extracellular  | SjCTGTACTGTTAATGACCAGCTTCTGAGAAGCTTTCTCACI thymic stromal lymphopoietin                                                    |
| Tyk2                            | <a href="#">NM_018793.2</a>    | JTK1                                | Cytoplasm,Nucleus,Phosphorylatio    | CCCAGAATGCCTGAAGGAGTGCAAATTTACTATGCATCT tyrosine kinase 2                                                                  |
| Tyrobp                          | <a href="#">NM_011662.2</a>    | DAP12, KARAP, killer cell activatin | Membrane,Integral To Membrane,      | CCAGAGTGACACTTCCCAAGATGCGACTGTCTCCGT TYRO protein tyrosine kinase binding protein                                          |
| Ube2l3                          | <a href="#">NM_009456.2</a>    | UbcM4, UbcE7                        | Cytoplasm,Nucleus,Protein Polyubi   | CCTGTCTTCTGCTTAACTTACTATAACTCCGGG ubiquitin-conjugating enzyme E2L 3                                                       |
| Vcam1                           | <a href="#">NM_011693.2</a>    | CD106, Vcam-1                       | External Side Of Plasma Membrane    | GGTTTTGAGGATGAACACTTACTGTGCGCTGTGACT vascular cell adhesion molecule 1                                                     |
| Vtn                             | <a href="#">NM_011707.2</a>    | Vn                                  | Proteinaceous Extracellular Matrix, | CACAGACGCAAGCCAGAGCTCGAACTCCCGTCGTTCAAT vitronectin                                                                        |
| Xbp1                            | <a href="#">NM_013842.2</a>    | XBP-1, TREB-5, TREB5, D11Ert        | 39Nucleus,Transcription Dna Depend  | CCTCTAGTTTTAGAGATCCCTCTGAGACAGAGAGTCAA X-box binding protein 1                                                             |
| Xcl1                            | <a href="#">NM_008510.1</a>    | Lptn, LTN, ATAC, Scyc1, SCM-1, SC   | Extracellular Region,Extracellular  | SjAGAGAGTAGTGTGAACTTACAACCAGCGGCTGCC chemokine (C motif) ligand 1                                                          |
| Xcr1                            | <a href="#">NM_011798.4</a>    | C motif-1/lymphotactin receptor,    | Membrane,Integral To Membrane,      | CTGTCTACTGCCTGTGTGATCTCAGACAATGGAGTGG chemokine (C motif) receptor 1                                                       |
| Zap70                           | <a href="#">NM_009539.2</a>    | Srk, ZAP-70, TZK                    | Membrane,Cytoplasm,Cytosol,Imm      | TACGAGAGTCCCTACAGCACCTGAGGAACCAAAGAC zeta-chain (TCR) associated protein kinase 7B                                         |
| Zbtb7b                          | <a href="#">NM_009565.4</a>    | c-Krox, Zfp67, Thpok                | Nucleus,Positive Regulation Of Tr   | Trar TGAAGCAATAATCTATCTGATTTGGGGTCCACTTC zinc finger and BTB domain containing 7B                                          |
| Zeb1                            | <a href="#">NM_011546.2</a>    | Nii2, MEB1, [delta]EF1, Tcf8, Zfx1z | Cytoplasm,Nucleus,Transcription F   | CTTAAGCAAGACCTGTGCTAAGTGCATCTCTCAGTATT zinc finger E-box binding homeobox 1                                                |
| <b>Internal Reference Genes</b> |                                |                                     |                                     |                                                                                                                            |
| Alas1                           | <a href="#">NM_020559.2</a>    | 5-aminolevulinat synthase, succi    | Cytoplasm,Nucleus,Mitochondrial     | FACTAGGAATATTTCTGGAACGAGCAAGTCCACGTAGAAI aminolevulinic acid synthase 1                                                    |
| Eef1g                           | <a href="#">NM_026007.4</a>    | EF1G                                | Translation                         | GGCAAGTTCACAGCATTTGAGGGTGATGATGGATTCTGT eukaryotic translation elongation factor 1 gamma                                   |
| G6pdx                           | <a href="#">NM_008062.2</a>    | G28A, Gpdx, G6pd                    | Cytoplasm,Nucleus,Cytosol,Micros    | ACATTCTAGTTCCTGGGCTGGACCCTATTTGTCCAT( glucose-6-phosphate dehydrogenase X-linked                                           |
| Gapdh                           | <a href="#">NM_001001303.1</a> | Gapd                                |                                     | AGTTGTCTCTGCGACTCAACAGCAACTCCCACTCTTC glyceraldehyde-3-phosphate dehydrogenase                                             |
| Gusb                            | <a href="#">NM_010368.1</a>    | g, Gut, Gur, asd, adipose storage   | c Endoplasmic Reticulum,Microsome   | AATACGTGGTCGGAGAGCTCATCTGGAATTCGCGACT glucuronidase, beta                                                                  |
| Hprt                            | <a href="#">NM_013556.2</a>    | Hprt1                               | Cytoplasm,Cytosol,Soluble Fraction  | TCGTGAGGCGGCGAGGAGCGTGGGCTTACTCTACI hypoxanthine guanine phosphoribosyl transferase                                        |
| Oaz1                            | <a href="#">NM_008753.4</a>    | AZ-1, AZ1, Antizyme, ODC-Az, Oaz    |                                     | GGCTGGCCCTCTCTGGTTAGTCCACATGTCTGATTG ornithine decarboxylase antizyme 1                                                    |
| Polr1b                          | <a href="#">NM_009086.2</a>    | RPA2, RPA116, 128kDa, Rpo1-2        | Cytoplasm,Nucleus,Nucleolus,Tran    | TGCTTCTCACTGAGAGTGGCATGATGCCGACATCTGTT polymerase (RNA) I polypeptide B                                                    |
| Polr2a                          | <a href="#">NM_009089.2</a>    | Rpo2-1, 220kDa                      | Nucleus,Dna Directed Rna Polymer    | GTGAATCGTATTCTCAATGATGCTCGAGACAAAAGTGGC polymerase (RNA) II (DNA directed) polypeptide A                                   |
| Ppia                            | <a href="#">NM_008907.1</a>    | RP23-198N14.9, 2700098C05, Cphn,    | Cyp18, CypA                         | CCAAGACTGAATGGCTGGATGGCAAGCATGTGGTCTTTG peptidylprolyl isomerase A                                                         |
| Rpl19                           | <a href="#">NM_009078.2</a>    |                                     | Ribonucleoprotein Complex,Riboso    | GCCTCTAGTGTCTCCGCTGCGGAAAAGAAAGGCTCG ribosomal protein L19                                                                 |
| Sdha                            | <a href="#">NM_023281.1</a>    | FP, SDH2, SDHF                      | Membrane,Mitochondrial Inner Me     | CTTGCGAGTGCATTTGGCTTTCTGAGGCAGGGTTAAT succinate dehydrogenase complex, subunit A, flavoprotein (Fp)                        |
| Tbp                             | <a href="#">NM_013684.3</a>    | Gtf2d                               | Cytoplasm,Nucleus,Transcription F   | GTGGCGGATCTGCTGGCGTTGGCTAGTTTCTGCG TATA box binding protein                                                                |
| Tubb5                           | <a href="#">NM_011655.4</a>    |                                     | Cytoplasm,Cytoskeleton,Microtubu    | ATTGGAAGTCTTCCCTGATTGGTTCTCTTCTCGGC tubulin, beta 5 class I                                                                |
